# Supplementary material for: m6A Regulator-Associated Modification Patterns and Immune Infiltration of the Tumor Microenvironment in Hepatocarcinoma
Source: Front Cell Dev Biol. 2021 Jul 2;9:687756. doi: 10.3389/fcell.2021.687756 (PMC8283020; doi:10.3389/fcell.2021.687756)
Supplement: Supplementary file 2 [file Table_2.XLSX]

## Sheet: TableS1
Table S1. the detailed clinical-pathological information of TCGA and ICGC cases selected for testing database and validation set
Variable	TCGA-LIHC set (n = 367)	ICGC-LIRI set (n = 203)
Median age
≤55	175	24
>55	192	179
Gender
Male	209	153
Female	158	50
Alcohol consumption
No	250	NA
Yes	117	NA
Virus infection
HBV	101	53
HCV	53	117
HBV and HCV	8	4
No infection/NA	213	29
Vascular invasion
No	182	NA
Yes	130	NA
Family history
No	207	NA
Yes	109	NA
AFP level
Low(≤300ng)	210	NA
High(>300ng)	66	NA
Histologic grade
G1/G2	229	NA
G3/G4	134	NA
TNM stage
I/II	242	129
III/IV	109	74

## Sheet: TableS2
Table S2. Information on antibodies used in this study
Antibody	IHC	immunofluorescent	Specificity	Company
CD3	1:200	1:200	Rabbit Polyclonal	Proteintech Group, China
CD8a	1:10000	1:10000	Rabbit Polyclonal	Proteintech Group, China
WTAP	1:500		Mouse Monoclonal	Proteintech Group, China
KIAA1429	1:200		Rabbit Polyclonal	Proteintech Group, China
RBM15	1:500		Rabbit Polyclonal	Proteintech Group, China
RBM15B	1:200		Rabbit Polyclonal	Proteintech Group, China
METTL3	1:200		Rabbit Polyclonal	Proteintech Group, China
METTL14	1:200		Rabbit Polyclonal	Proteintech Group, China
METTL16	1:200		Rabbit Polyclonal	Proteintech Group, China
FTO	1:200		Rabbit Polyclonal	Proteintech Group, China
ALKBH5	1:500		Rabbit Polyclonal	Proteintech Group, China
HNRNPA2B1	1:500		Rabbit Polyclonal	Proteintech Group, China
HNRNPC	1:200		Rabbit Polyclonal	Proteintech Group, China
YTHDF1	1:200	1：200	Rabbit Polyclonal	Proteintech Group, China
YTHDF2	1:200		Rabbit Polyclonal	Proteintech Group, China
YTHDF3	1:200		Rabbit Polyclonal	Proteintech Group, China
YTHDC1	1:200		Rabbit Polyclonal	Proteintech Group, China
HNRNPG	1:500		Rabbit Polyclonal	Proteintech Group, China
YTHDC2	1:500		Rabbit Polyclonal	Proteintech Group, China
IGF2BP1	1:200		Rabbit Polyclonal	Proteintech Group, China
IGF2BP2	1:200		Rabbit Polyclonal	Proteintech Group, China
IGF2BP3	1:200		Rabbit Polyclonal	Proteintech Group, China
EIF3A	1:500		Rabbit Polyclonal	Proteintech Group, China

## Sheet: TableS3
Table S3. Gene signatures used in this study for marking 24 types immune infiltration cells
CellType	AffymetrixID	Gene Symbol	ENTREZ_GENE_ID
aDC	205569_at	LAMP3	27074
aDC	207533_at	CCL1	6346
aDC	210029_at	IDO1	3620
aDC	218400_at	OAS3	4940
aDC	219424_at	EBI3	10148
B cells	204836_at	GLDC	2731
B cells	205229_s_at	COCH	1690
B cells	205316_at	SLC15A2	6565
B cells	205544_s_at	CR2	1380
B cells	205671_s_at	HLA-DOB	3112
B cells	205861_at	SPIB	6689
B cells	205901_at	PNOC	5368
B cells	206255_at	BLK	640
B cells	206398_s_at	CD19	930
B cells	206478_at	KIAA0125	9834
B cells	206641_at	TNFRSF17	608
B cells	206896_s_at	GNG7	2788
B cells	207445_s_at	CCR9	10803
B cells	207655_s_at	BLNK	29760
B cells	207819_s_at	ABCB4	5244
B cells	209199_s_at	MEF2C	4208
B cells	209200_at	MEF2C	4208
B cells	209374_s_at	IGHM	3507
B cells	209995_s_at	TCL1A	8115
B cells	210347_s_at	BCL11A	53335
B cells	210356_x_at	MS4A1	931
B cells	210432_s_at	SCN3A	6328
B cells	212715_s_at	MICAL3	57553
B cells	213674_x_at	IGHD	3495
B cells	215118_s_at	AL928768.3 /// Ig alpha 1-[alpha]2m /// IGH	3492
B cells	215217_at	IGKC	3514
B cells	215565_at	LOC101929272	101929272
B cells	215925_s_at	CD72	971
B cells	217138_x_at	IGLC1	3537
B cells	217418_x_at	MS4A1	931
B cells	218948_at	QRSL1	55278
B cells	218949_s_at	QRSL1	55278
B cells	219073_s_at	OSBPL10	114884
B cells	219497_s_at	BCL11A	53335
B cells	220377_at	KIAA0125	9834
B cells	221234_s_at	BACH2	60468
B cells	221239_s_at	FCRL2	79368
B cells	222285_at	IGHD	3495
B cells	39318_at	TCL1A	8115
Blood vessels	204677_at	CDH5	1003
CD8 T cells	200664_s_at	DNAJB1	3337
CD8 T cells	200666_s_at	DNAJB1	3337
CD8 T cells	201367_s_at	ZFP36L2	678
CD8 T cells	201369_s_at	ZFP36L2	678
CD8 T cells	201557_at	VAMP2	6844
CD8 T cells	202165_at	PPP1R2	5504
CD8 T cells	202495_at	TBCC	6903
CD8 T cells	202595_s_at	LEPROTL1	23484
CD8 T cells	203538_at	CAMLG	819
CD8 T cells	203543_s_at	KLF9	687
CD8 T cells	203725_at	GADD45A	1647
CD8 T cells	205758_at	CD8A	925
CD8 T cells	206059_at	ZNF91	7644
CD8 T cells	206390_x_at	PF4	5196
CD8 T cells	206555_s_at	THUMPD1	55623
CD8 T cells	207001_x_at	TSC22D3	1831
CD8 T cells	207057_at	SLC16A7	9194
CD8 T cells	207460_at	GZMM	3004
CD8 T cells	208078_s_at	SIK1	150094
CD8 T cells	208319_s_at	RBM3	5935
CD8 T cells	209871_s_at	APBA2	321
CD8 T cells	210054_at	HAUS3	79441
CD8 T cells	210172_at	SF1	7536
CD8 T cells	210607_at	FLT3LG	2323
CD8 T cells	212574_x_at	TMEM259	91304
CD8 T cells	212620_at	ZNF609	23060
CD8 T cells	213649_at	SRSF7	6432
CD8 T cells	214617_at	PRF1	5551
CD8 T cells	214958_s_at	TMC6	11322
CD8 T cells	216361_s_at	KAT6A	7994
CD8 T cells	217729_s_at	AES	166
CD8 T cells	218006_s_at	ZNF22	7570
CD8 T cells	218405_at	ABT1	29777
CD8 T cells	218929_at	CDKN2AIP	55602
CD8 T cells	219168_s_at	PRR5	55615
CD8 T cells	219541_at	LIME1	54923
CD8 T cells	47069_at	PRR5	55615
CD8 T cells	64432_at	MAPKAPK5-AS1	51275
Cytotoxic cells	204198_s_at	RUNX3	864
Cytotoxic cells	204794_at	DUSP2	1844
Cytotoxic cells	205488_at	GZMA	3001
Cytotoxic cells	205495_s_at	GNLY	10578
Cytotoxic cells	205883_at	ZBTB16	7704
Cytotoxic cells	207795_s_at	KLRD1	3824
Cytotoxic cells	207796_x_at	KLRD1	3824
Cytotoxic cells	209870_s_at	APBA2	321
Cytotoxic cells	210321_at	GZMH	2999
Cytotoxic cells	210426_x_at	RORA	6095
Cytotoxic cells	210606_x_at	KLRD1	3824
Cytotoxic cells	213915_at	NKG7	4818
Cytotoxic cells	214450_at	CTSW	1521
Cytotoxic cells	214470_at	KLRB1	3820
Cytotoxic cells	218921_at	SIGIRR	59307
Cytotoxic cells	220646_s_at	KLRF1	51348
Cytotoxic cells	221087_s_at	APOL3	80833
Cytotoxic cells	37145_at	GNLY	10578
Cytotoxic cells	52940_at	SIGIRR	59307
DC	205404_at	HSD11B1	3290
DC	206407_s_at	CCL13	6357
DC	207277_at	CD209	30835
DC	207861_at	CCL22	6367
DC	207900_at	CCL17	6361
DC	212841_s_at	PPFIBP2	8495
DC	32625_at	NPR1	4881
Eosinophils	201108_s_at	THBS1	7057
Eosinophils	201109_s_at	THBS1	7057
Eosinophils	202981_x_at	SIAH1	6477
Eosinophils	203313_s_at	TGIF1	7050
Eosinophils	203394_s_at	HES1	3280
Eosinophils	203395_s_at	HES1	3280
Eosinophils	204301_at	KBTBD11	9920
Eosinophils	204776_at	THBS4	7060
Eosinophils	205262_at	KCNH2	3757
Eosinophils	205566_at	ABHD2	11057
Eosinophils	206111_at	RNASE2	6036
Eosinophils	206207_at	CLC	1178
Eosinophils	206361_at	PTGDR2	11251
Eosinophils	207111_at	EMR1	2015
Eosinophils	207167_at	CD101	9398
Eosinophils	207594_s_at	SYNJ1	8867
Eosinophils	208304_at	CCR3	1232
Eosinophils	209398_at	HIST1H1C	3006
Eosinophils	210036_s_at	KCNH2	3757
Eosinophils	210744_s_at	IL5RA	3568
Eosinophils	211517_s_at	IL5RA	3568
Eosinophils	211810_s_at	GALC	2581
Eosinophils	211922_s_at	CAT	847
Eosinophils	212665_at	TIPARP	25976
Eosinophils	212990_at	SYNJ1	8867
Eosinophils	214183_s_at	TKTL1	8277
Eosinophils	214873_at	LRP5L	91355
Eosinophils	216360_x_at	RRP12	23223
Eosinophils	216370_s_at	TKTL1	8277
Eosinophils	218344_s_at	RCOR3	55758
Eosinophils	219695_at	SMPD3	55512
Eosinophils	220813_at	CYSLTR2	57105
Eosinophils	221170_at	HRH4	59340
Eosinophils	221928_at	ACACB	32
Eosinophils	222195_s_at	C9orf156	51531
Eosinophils	43427_at	ACACB	32
Eosinophils	49452_at	ACACB	32
Eosinophils	59375_at	MYO15B	80022
iDC	202201_at	BLVRB	645
iDC	202286_s_at	TACSTD2	4070
iDC	203104_at	CSF1R	1436
iDC	203305_at	F13A1	2162
iDC	203815_at	GSTT1	2952
iDC	203911_at	RAP1GAP	5909
iDC	203940_s_at	VASH1	22846
iDC	203980_at	FABP4	2167
iDC	204117_at	PREP	5550
iDC	204580_at	MMP12	4321
iDC	204925_at	CTNS	1497
iDC	205613_at	SYT17	51760
iDC	205987_at	CD1C	911
iDC	206062_at	GUCA1A	2978
iDC	206682_at	CLEC10A	10462
iDC	206749_at	CD1B	910
iDC	206932_at	CH25H	9023
iDC	208510_s_at	PPARG	5468
iDC	208592_s_at	CD1E	913
iDC	209735_at	ABCG2	9429
iDC	210220_at	FZD2	2535
iDC	210325_at	CD1A	909
iDC	215784_at	CD1E	913
iDC	216604_s_at	SLC7A8	23428
iDC	218019_s_at	PDXK	8566
iDC	218375_at	NUDT9	53343
iDC	219666_at	MS4A6A	64231
iDC	219697_at	HS3ST2	9956
iDC	221266_s_at	DCSTAMP	81501
iDC	221274_s_at	LMAN2L	81562
Lymph vessels	204879_at	PDPN	10630
Lymph vessels	209946_at	VEGFC	7424
Macrophages	201324_at	EMP1	2012
Macrophages	201647_s_at	SCARB2	950
Macrophages	202052_s_at	RAI14	26064
Macrophages	202450_s_at	CTSK	1513
Macrophages	203381_s_at	APOE	348
Macrophages	203645_s_at	CD163	9332
Macrophages	203646_at	FDX1	2230
Macrophages	203889_at	SCG5	6447
Macrophages	203922_s_at	CYBB	1536
Macrophages	204058_at	ME1	4199
Macrophages	204983_s_at	GPC4	2239
Macrophages	204984_at	GPC4	2239
Macrophages	205206_at	KAL1	3730
Macrophages	205342_s_at	SULT1C2	6819
Macrophages	205819_at	MARCO	8685
Macrophages	208075_s_at	CCL7	6354
Macrophages	208168_s_at	CHIT1	1118
Macrophages	208423_s_at	MSR1	4481
Macrophages	209396_s_at	CHI3L1	1116
Macrophages	211190_x_at	CD84	8832
Macrophages	211470_s_at	SULT1C2	6819
Macrophages	211748_x_at	PTGDS	5730
Macrophages	211887_x_at	MSR1	4481
Macrophages	212187_x_at	PTGDS	5730
Macrophages	212989_at	SGMS1	259230
Macrophages	214390_s_at	BCAT1	586
Macrophages	214452_at	BCAT1	586
Macrophages	214701_s_at	FN1	2335
Macrophages	214770_at	MSR1	4481
Macrophages	214974_x_at	CXCL5	6374
Macrophages	215049_x_at	CD163	9332
Macrophages	215891_s_at	GM2A	2760
Macrophages	218673_s_at	ATG7	10533
Macrophages	219295_s_at	PCOLCE2	26577
Macrophages	219607_s_at	MS4A4A	51338
Macrophages	219890_at	CLEC5A	23601
Macrophages	220380_at	DNASE2B	58511
Macrophages	221019_s_at	COLEC12	81035
Macrophages	52651_at	COL8A2	1296
Mast cells	203196_at	ABCC4	10257
Mast cells	203949_at	MPO	4353
Mast cells	204035_at	SCG2	7857
Mast cells	204041_at	MAOB	4129
Mast cells	205011_at	VWA5A	4013
Mast cells	205051_s_at	KIT	3815
Mast cells	205127_at	PTGS1	5742
Mast cells	205428_s_at	CALB2	794
Mast cells	205624_at	CPA3	1359
Mast cells	205653_at	CTSG	1511
Mast cells	205683_x_at	TPSAB1	7177
Mast cells	205857_at	SLC18A2	6571
Mast cells	206281_at	ADCYAP1	116
Mast cells	206283_s_at	TAL1	6886
Mast cells	206519_x_at	SIGLEC6	946
Mast cells	206520_x_at	SIGLEC6	946
Mast cells	206645_s_at	NR0B1	190
Mast cells	206676_at	CEACAM8	1088
Mast cells	206726_at	HPGDS	27306
Mast cells	206871_at	ELANE	1991
Mast cells	207067_s_at	HDC	3067
Mast cells	207134_x_at	TPSB2	64499
Mast cells	207496_at	MS4A2	2206
Mast cells	207497_s_at	MS4A2	2206
Mast cells	207741_x_at	TPSAB1	7177
Mast cells	209710_at	GATA2	2624
Mast cells	210084_x_at	TPSAB1	7177
Mast cells	210102_at	VWA5A	4013
Mast cells	210796_x_at	SIGLEC6	946
Mast cells	211549_s_at	HPGD	3248
Mast cells	211743_s_at	PRG2	5553
Mast cells	212686_at	PPM1H	57460
Mast cells	214533_at	CMA1	1215
Mast cells	215039_at	LINC01140	339524
Mast cells	215382_x_at	TPSAB1	7177
Mast cells	218211_s_at	MLPH	79083
Mast cells	219090_at	SLC24A3	57419
Mast cells	57588_at	SLC24A3	57419
Neutrophils	202877_s_at	CD93	22918
Neutrophils	202878_s_at	CD93	22918
Neutrophils	203434_s_at	MME	4311
Neutrophils	203435_s_at	MME	4311
Neutrophils	203591_s_at	CSF3R	1441
Neutrophils	204007_at	FCGR3B	2215
Neutrophils	204307_at	TECPR2	9895
Neutrophils	205119_s_at	FPR1	2357
Neutrophils	205715_at	BST1	683
Neutrophils	205863_at	S100A12	6283
Neutrophils	205896_at	SLC22A4	6583
Neutrophils	206222_at	TNFRSF10C	8794
Neutrophils	206515_at	CYP4F3	4051
Neutrophils	206522_at	MGAM	8972
Neutrophils	207008_at	CXCR2	3579
Neutrophils	207094_at	CXCR1	3577
Neutrophils	207674_at	FCAR	2204
Neutrophils	208052_x_at	CEACAM3	1084
Neutrophils	210146_x_at	LILRB2	10288
Neutrophils	210772_at	FPR2	2358
Neutrophils	210773_s_at	FPR2	2358
Neutrophils	210789_x_at	CEACAM3	1084
Neutrophils	211163_s_at	TNFRSF10C	8794
Neutrophils	211307_s_at	FCAR	2204
Neutrophils	211806_s_at	KCNJ15	3772
Neutrophils	211816_x_at	FCAR	2204
Neutrophils	213524_s_at	G0S2	50486
Neutrophils	215783_s_at	ALPL	249
Neutrophils	218136_s_at	SLC25A37	51312
Neutrophils	218610_s_at	CPPED1	55313
Neutrophils	218660_at	DYSF	8291
Neutrophils	219403_s_at	HPSE	10855
Neutrophils	220000_at	SIGLEC5	8778
Neutrophils	220528_at	VNN3	55350
Neutrophils	221541_at	CRISPLD2	83716
NK CD56bright cells	204014_at	DUSP4	1846
NK CD56bright cells	204015_s_at	DUSP4	1846
NK CD56bright cells	204691_x_at	PLA2G6	8398
NK CD56bright cells	204803_s_at	RRAD	6236
NK CD56bright cells	205906_at	FOXJ1	2302
NK CD56bright cells	206365_at	XCL1	6375
NK CD56bright cells	206436_at	MPPED1	758
NK CD56bright cells	210647_x_at	PLA2G6	8398
NK CD56bright cells	214676_x_at	MUC3B	57876
NK CD56bright cells	215409_at	LPCAT4	254531
NK CD56bright cells	215938_s_at	PLA2G6	8398
NK CD56bright cells	221672_s_at	TRAPPC9	83696
NK CD56bright cells	38398_at	MADD	8567
NK CD56dim cells	202320_at	GTF3C1	2975
NK CD56dim cells	208179_x_at	KIR2DL3	3804
NK CD56dim cells	208203_x_at	KIR2DS5	3810
NK CD56dim cells	210164_at	GZMB	3002
NK CD56dim cells	211389_x_at	KIR3DS1	3813
NK CD56dim cells	211532_x_at	KIR2DS2	100132285
NK CD56dim cells	211687_x_at	KIR3DL1	3811
NK CD56dim cells	216434_at	TTC38	55020
NK CD56dim cells	216552_x_at	KIR2DS4	3809
NK CD56dim cells	216676_x_at	KIR3DL3	115653
NK CD56dim cells	217875_s_at	PMEPA1	56937
NK CD56dim cells	221417_x_at	S1PR5	53637
NK CD56dim cells	221658_s_at	IL21R	50615
NK cells	203426_s_at	IGFBP5	3488
NK cells	203842_s_at	MAPRE3	22924
NK cells	206180_x_at	ZNF747	65988
NK cells	206366_x_at	XCL1	6375
NK cells	206416_at	ZNF205	7755
NK cells	206438_x_at	TCTN2	79867
NK cells	206827_s_at	TRPV6	55503
NK cells	206986_at	FGF18	8817
NK cells	207004_at	BCL2	596
NK cells	207555_s_at	TBXA2R	6915
NK cells	207860_at	NCR1	9437
NK cells	209057_x_at	CDC5L	988
NK cells	209280_at	MRC2	9902
NK cells	209415_at	FZR1	51343
NK cells	209646_x_at	ALDH1B1	219
NK cells	209979_at	ADARB1	104
NK cells	210459_at	PSMD4	5710
NK cells	211225_at	FUT5	2527
NK cells	211865_s_at	FZR1	51343
NK cells	212972_x_at	APBB2	323
NK cells	214174_s_at	PDLIM4	8572
NK cells	215019_x_at	ZNF528	84436
NK cells	215582_x_at	MCM3AP	8888
NK cells	216888_at	LDB3	11155
NK cells	217058_at	GNAS	2778
NK cells	217088_s_at	NCR1	9437
NK cells	217095_x_at	NCR1	9437
NK cells	219058_x_at	TINAGL1	64129
NK cells	220024_s_at	PRX	57716
NK cells	220181_x_at	SLC30A5	64924
NK cells	221068_at	KANK2	25959
Normal mucosa	200795_at	SPARCL1	8404
Normal mucosa	201162_at	IGFBP7	3490
Normal mucosa	201497_x_at	MYH11	4629
Normal mucosa	201616_s_at	CALD1	800
Normal mucosa	201852_x_at	COL3A1	1281
Normal mucosa	201884_at	CEACAM5	1048
Normal mucosa	201893_x_at	DCN	1634
Normal mucosa	202202_s_at	LAMA4	3910
Normal mucosa	202274_at	ACTG2	72
Normal mucosa	202291_s_at	MGP	4256
Normal mucosa	202489_s_at	FXYD3	5349
Normal mucosa	202555_s_at	MYLK	4638
Normal mucosa	202994_s_at	FBLN1	2192
Normal mucosa	203824_at	TSPAN8	7103
Normal mucosa	203903_s_at	HEPH	9843
Normal mucosa	204272_at	LGALS4	3960
Normal mucosa	205547_s_at	TAGLN	6876
Normal mucosa	205809_s_at	WASL	8976
Normal mucosa	206116_s_at	TPM1	7168
Normal mucosa	207961_x_at	MYH11	4629
Normal mucosa	209071_s_at	RGS5	8490
Normal mucosa	209173_at	AGR2	10551
Normal mucosa	209289_at	NFIB	4781
Normal mucosa	209355_s_at	PPAP2B	8613
Normal mucosa	209612_s_at	ADH1B	125
Normal mucosa	209847_at	CDH17	1015
Normal mucosa	210987_x_at	TPM1	7168
Normal mucosa	211161_s_at	COL3A1	1281
Normal mucosa	211896_s_at	DCN	1634
Normal mucosa	211959_at	IGFBP5	3488
Normal mucosa	212067_s_at	C1R	715
Normal mucosa	212077_at	CALD1	800
Normal mucosa	212097_at	CAV1	857
Normal mucosa	212226_s_at	PPAP2B	8613
Normal mucosa	212294_at	GNG12	55970
Normal mucosa	213944_x_at	GNA11	2767
Normal mucosa	213953_at	KRT20	54474
Normal mucosa	215076_s_at	COL3A1	1281
Normal mucosa	564_at	GNA11	2767
pDC	206148_at	IL3RA	3563
SW480 cancer cells	200894_s_at	FKBP4	2288
SW480 cancer cells	201820_at	KRT5	3852
SW480 cancer cells	202504_at	TRIM29	23650
SW480 cancer cells	203304_at	BAMBI	25805
SW480 cancer cells	203417_at	MFAP2	4237
SW480 cancer cells	203423_at	RBP1	5947
SW480 cancer cells	203797_at	VSNL1	7447
SW480 cancer cells	203798_s_at	VSNL1	7447
SW480 cancer cells	204268_at	S100A2	6273
SW480 cancer cells	204540_at	EEF1A2	1917
SW480 cancer cells	204733_at	KLK6	5653
SW480 cancer cells	204989_s_at	ITGB4	3691
SW480 cancer cells	205258_at	INHBB	3625
SW480 cancer cells	205774_at	F12	2161
SW480 cancer cells	206027_at	S100A3	6274
SW480 cancer cells	207239_s_at	CDK16	5127
SW480 cancer cells	207360_s_at	NTSR1	4923
SW480 cancer cells	207529_at	DEFA5	1670
SW480 cancer cells	207935_s_at	KRT13	3860
SW480 cancer cells	208711_s_at	CCND1	595
SW480 cancer cells	208916_at	SLC1A5	6510
SW480 cancer cells	209591_s_at	BMP7	655
SW480 cancer cells	209784_s_at	JAG2	3714
SW480 cancer cells	209885_at	RHOD	29984
SW480 cancer cells	210854_x_at	SLC6A8	6535
SW480 cancer cells	211518_s_at	BMP4	652
SW480 cancer cells	213713_s_at	GLB1L2	89944
SW480 cancer cells	213843_x_at	SLC6A8	6535
SW480 cancer cells	214079_at	DHRS2	10202
SW480 cancer cells	214571_at	FGF3	2248
SW480 cancer cells	218678_at	NES	10763
SW480 cancer cells	218908_at	ASPSCR1	79058
SW480 cancer cells	219143_s_at	RPP25	54913
SW480 cancer cells	219491_at	LRFN4	78999
SW480 cancer cells	219733_s_at	SLC27A5	10998
SW480 cancer cells	221701_s_at	STRA6	64220
SW480 cancer cells	32137_at	JAG2	3714
SW480 cancer cells	41037_at	TEAD4	7004
T cells	202747_s_at	ITM2A	9452
T cells	204890_s_at	LCK	3932
T cells	204891_s_at	LCK	3932
T cells	205456_at	CD3E	916
T cells	205790_at	SKAP1	8631
T cells	205831_at	CD2	914
T cells	206545_at	CD28	940
T cells	206761_at	CD96	10225
T cells	206804_at	CD3G	917
T cells	209670_at	TRAC	28755
T cells	209671_x_at	TRAC	28755
T cells	210038_at	PRKCQ	5588
T cells	210039_s_at	PRKCQ	5588
T cells	210116_at	SH2D1A	4068
T cells	210915_x_at	TRBC1	28639
T cells	211685_s_at	NCALD	83988
T cells	213193_x_at	TRBC1	28639
T cells	213539_at	CD3D	915
T cells	213830_at	YME1L1	10730
T cells	213958_at	CD6	923
T cells	216191_s_at	TRDV3	28516
T cells	217147_s_at	TRAT1	50852
T cells	219528_s_at	BCL11B	64919
T helper cells	200683_s_at	UBE2L3	7332
T helper cells	201306_s_at	ANP32B	10541
T helper cells	201414_s_at	NAP1L4	4676
T helper cells	201528_at	RPA1	6117
T helper cells	202361_at	SEC24C	9632
T helper cells	202746_at	ITM2A	9452
T helper cells	203340_s_at	SLC25A12	8604
T helper cells	203428_s_at	ASF1A	25842
T helper cells	205446_s_at	ATF2	1386
T helper cells	205965_at	BATF	10538
T helper cells	208798_x_at	GOLGA8A	23015
T helper cells	210439_at	ICOS	29851
T helper cells	211856_x_at	CD28	940
T helper cells	212546_s_at	FRYL	285527
T helper cells	213305_s_at	PPP2R5C	5527
T helper cells	213594_x_at	SRSF10	10772
T helper cells	214109_at	LRBA	987
T helper cells	218248_at	FAM111A	63901
T helper cells	218768_at	NUP107	57122
T helper cells	219126_at	PHF10	55274
T helper cells	219544_at	BORA	79866
T helper cells	221699_s_at	DDX50	79009
Tcm	203578_s_at	SLC7A6	9057
Tcm	203747_at	AQP3	360
Tcm	204576_s_at	CLUAP1	23059
Tcm	205285_s_at	FYB	2533
Tcm	206624_at	USP9Y	8287
Tcm	206828_at	TXK	7294
Tcm	206965_at	KLF12	11278
Tcm	207686_s_at	CASP8	841
Tcm	207971_s_at	CEP68	23177
Tcm	208442_s_at	ATM	472
Tcm	209997_x_at	PCM1	5108
Tcm	210441_at	CDC14A	8556
Tcm	210556_at	NFATC3	4775
Tcm	210800_at	TIMM8A	1678
Tcm	210858_x_at	ATM	472
Tcm	213472_at	HNRNPH1	3187
Tcm	213584_s_at	CREBZF	58487
Tcm	214131_at	TXLNGY	246126
Tcm	214272_at	CYLD	1540
Tcm	214786_at	MAP3K1	4214
Tcm	215041_s_at	DOCK9	23348
Tcm	215105_at	N4BP2L2-IT2	116828
Tcm	215175_at	PCNX	22990
Tcm	215201_at	REPS1	85021
Tcm	215275_at	TRAF3IP3	80342
Tcm	215521_at	PHC3	80012
Tcm	215743_at	NMT2	9397
Tcm	216624_s_at	KMT2A	4297
Tcm	217610_at	SPDYE2	441273
Tcm	221638_s_at	STX16	8675
Tcm	221805_at	NEFL	4747
Tem	201759_at	TBCD	6904
Tem	201815_s_at	TBC1D5	9779
Tem	205897_at	NFATC4	4776
Tem	206279_at	PRKY	5616
Tem	206978_at	CCR2	729230
Tem	207106_s_at	LTK	4058
Tem	207794_at	CCR2	729230
Tem	208262_x_at	MEFV	4210
Tem	208719_s_at	DDX17	10521
Tem	210109_at	SND1-IT1	27099
Tem	210786_s_at	FLI1	2313
Tem	211825_s_at	FLI1	2313
Tem	212609_s_at	AKT3	10000
Tem	217230_at	EZR	7430
Tem	217397_at	TCRA /// TCRA /// TRAV10 /// TRAV10 /// YME1L1	10730
Tem	32502_at	GDPD5	81544
TFH	202786_at	STK39	27347
TFH	204201_s_at	PTPN13	5783
TFH	204260_at	CHGB	1114
TFH	204529_s_at	TOX	9760
TFH	204995_at	CDK5R1	8851
TFH	205242_at	CXCL13	10563
TFH	205336_at	PVALB	5816
TFH	206126_at	CXCR5	643
TFH	206363_at	MAF	4094
TFH	207634_at	PDCD1	5133
TFH	207949_s_at	ICA1	3382
TFH	207996_s_at	LDLRAD4	753
TFH	208189_s_at	MYO7A	4647
TFH	209348_s_at	MAF	4094
TFH	209574_s_at	LDLRAD4	753
TFH	210055_at	TSHR	7253
TFH	210073_at	ST8SIA1	6489
TFH	210480_s_at	MYO6	4646
TFH	210547_x_at	ICA1	3382
TFH	210993_s_at	SMAD1	4086
TFH	213060_s_at	CHI3L2	1117
TFH	213534_s_at	PASK	23178
TFH	214463_x_at	HIST1H4J	8363
TFH	216734_s_at	CXCR5	643
TFH	216945_x_at	PASK	23178
TFH	218259_at	MKL2	57496
TFH	218476_at	POMT1	10585
TFH	218573_at	MAGEH1	28986
TFH	218839_at	HEY1	23462
TFH	219256_s_at	SH3TC1	54436
TFH	219521_at	B3GAT1	27087
TFH	219615_s_at	KCNK5	8645
TFH	220212_s_at	THADA	63892
TFH	220485_s_at	SIRPG	55423
TFH	220868_s_at	SLC7A10	56301
TFH	221874_at	KIAA1324	57535
TFH	33197_at	MYO7A	4647
TFH	44783_s_at	HEY1	23462
TFH	54632_at	THADA	63892
TFH	57516_at	ZNF764	92595
Tgd	203562_at	FEZ1	9638
Tgd	205103_at	C1orf61	10485
Tgd	207840_at	CD160	11126
Tgd	217143_s_at	TCRDV2 /// TRDC /// TRDC /// YME1L1	10730
Th1 cells	201525_at	APOD	347
Th1 cells	201641_at	BST2	684
Th1 cells	203716_s_at	DPP4	1803
Th1 cells	204103_at	CCL4	6351
Th1 cells	205120_s_at	SGCB	6443
Th1 cells	205282_at	LRP8	7804
Th1 cells	205548_s_at	BTG3	10950
Th1 cells	205691_at	SYNGR3	9143
Th1 cells	205692_s_at	CD38	952
Th1 cells	206508_at	CD70	970
Th1 cells	206806_at	DGKI	9162
Th1 cells	206975_at	LTA	4049
Th1 cells	206999_at	IL12RB2	3595
Th1 cells	209457_at	DUSP5	1847
Th1 cells	209840_s_at	LRRN3	54674
Th1 cells	210229_s_at	CSF2	1437
Th1 cells	210354_at	IFNG	3458
Th1 cells	210571_s_at	CMAHP	8418
Th1 cells	211478_s_at	DPP4	1803
Th1 cells	212062_at	ATP9A	10079
Th1 cells	213419_at	APBB2	323
Th1 cells	214844_s_at	DOK5	55816
Th1 cells	219454_at	EGFL6	25975
Th1 cells	220118_at	ZBTB32	27033
Th1 cells	221165_s_at	IL22	50616
Th1 cells	221331_x_at	CTLA4	1493
Th1 cells	38037_at	HBEGF	1839
Th1 cells	40148_at	APBB2	323
Th17 cells	205707_at	IL17RA	23765
Th17 cells	206419_at	RORC	6097
Th17 cells	208402_at	IL17A	3605
Th17 cells	216876_s_at	IL17A	3605
Th2 cells	202534_x_at	DHFR	1719
Th2 cells	202691_at	SNRPD1	6632
Th2 cells	202967_at	GSTA4	2941
Th2 cells	203076_s_at	SMAD2	4087
Th2 cells	203077_s_at	SMAD2	4087
Th2 cells	204179_at	MB	4151
Th2 cells	204510_at	CDC7	8317
Th2 cells	204728_s_at	WDHD1	11169
Th2 cells	205167_s_at	CDC25C	995
Th2 cells	206942_s_at	PMCH	5367
Th2 cells	206974_at	CXCR6	10663
Th2 cells	207509_s_at	LAIR2	3904
Th2 cells	208131_s_at	PTGIS	5740
Th2 cells	208353_x_at	ANK1	286
Th2 cells	209172_s_at	CENPF	1063
Th2 cells	209602_s_at	GATA3	2625
Th2 cells	209717_at	EVI5	7813
Th2 cells	210334_x_at	BIRC5	332
Th2 cells	210617_at	PHEX	5251
Th2 cells	211469_s_at	CXCR6	10663
Th2 cells	212110_at	SLC39A14	23516
Th2 cells	212472_at	MICAL2	9645
Th2 cells	213245_at	ADCY1	107
Th2 cells	217892_s_at	LIMA1	51474
Th2 cells	219502_at	NEIL3	55247
Th2 cells	220085_at	HELLS	3070
Th2 cells	220841_s_at	AHI1	54806
Th2 cells	220842_at	AHI1	54806
Th2 cells	221111_at	IL26	55801
Th2 cells	221569_at	AHI1	54806
Th2 cells	48808_at	DHFR	1719
TReg	221333_at	FOXP3	50943
TReg	221334_s_at	FOXP3	50943

## Sheet: TableS4
Table S4. Gene signatures used in this study for marking biological processes
Biological processes	Genes	Source
APAP (Antigen processing and presentation)	DCN	KEGG hsa04612
APAP (Antigen processing and presentation)	E2F4	KEGG hsa04612
APAP (Antigen processing and presentation)	E2F5	KEGG hsa04612
APAP (Antigen processing and presentation)	EP300	KEGG hsa04612
APAP (Antigen processing and presentation)	FST	KEGG hsa04612
APAP (Antigen processing and presentation)	GDF5	KEGG hsa04612
APAP (Antigen processing and presentation)	GDF6	KEGG hsa04612
APAP (Antigen processing and presentation)	GDF7	KEGG hsa04612
APAP (Antigen processing and presentation)	ID1	KEGG hsa04612
APAP (Antigen processing and presentation)	ID2	KEGG hsa04612
APAP (Antigen processing and presentation)	ID3	KEGG hsa04612
APAP (Antigen processing and presentation)	ID4	KEGG hsa04612
APAP (Antigen processing and presentation)	IFNG	KEGG hsa04612
APAP (Antigen processing and presentation)	INHBA	KEGG hsa04612
APAP (Antigen processing and presentation)	INHBB	KEGG hsa04612
APAP (Antigen processing and presentation)	INHBC	KEGG hsa04612
APAP (Antigen processing and presentation)	INHBE	KEGG hsa04612
APAP (Antigen processing and presentation)	LEFTY1	KEGG hsa04612
APAP (Antigen processing and presentation)	LEFTY2	KEGG hsa04612
APAP (Antigen processing and presentation)	LTBP1	KEGG hsa04612
APAP (Antigen processing and presentation)	MAPK1	KEGG hsa04612
APAP (Antigen processing and presentation)	MAPK3	KEGG hsa04612
APAP (Antigen processing and presentation)	MYC	KEGG hsa04612
APAP (Antigen processing and presentation)	NODAL	KEGG hsa04612
APAP (Antigen processing and presentation)	NOG	KEGG hsa04612
APAP (Antigen processing and presentation)	PITX2	KEGG hsa04612
APAP (Antigen processing and presentation)	PPP2CA	KEGG hsa04612
APAP (Antigen processing and presentation)	PPP2CB	KEGG hsa04612
APAP (Antigen processing and presentation)	PPP2R1A	KEGG hsa04612
APAP (Antigen processing and presentation)	PPP2R1B	KEGG hsa04612
APAP (Antigen processing and presentation)	RBL1	KEGG hsa04612
APAP (Antigen processing and presentation)	RBL2	KEGG hsa04612
APAP (Antigen processing and presentation)	RBX1	KEGG hsa04612
APAP (Antigen processing and presentation)	RHOA	KEGG hsa04612
APAP (Antigen processing and presentation)	ROCK1	KEGG hsa04612
APAP (Antigen processing and presentation)	ROCK2	KEGG hsa04612
APAP (Antigen processing and presentation)	RPS6KB1	KEGG hsa04612
APAP (Antigen processing and presentation)	RPS6KB2	KEGG hsa04612
APAP (Antigen processing and presentation)	SKP1	KEGG hsa04612
APAP (Antigen processing and presentation)	SMAD1	KEGG hsa04612
APAP (Antigen processing and presentation)	SMAD2	KEGG hsa04612
APAP (Antigen processing and presentation)	SMAD3	KEGG hsa04612
APAP (Antigen processing and presentation)	SMAD4	KEGG hsa04612
APAP (Antigen processing and presentation)	SMAD5	KEGG hsa04612
APAP (Antigen processing and presentation)	SMAD6	KEGG hsa04612
APAP (Antigen processing and presentation)	SMAD7	KEGG hsa04612
APAP (Antigen processing and presentation)	SMAD9	KEGG hsa04612
APAP (Antigen processing and presentation)	SMURF1	KEGG hsa04612
APAP (Antigen processing and presentation)	SMURF2	KEGG hsa04612
APAP (Antigen processing and presentation)	SP1	KEGG hsa04612
APAP (Antigen processing and presentation)	TFDP1	KEGG hsa04612
APAP (Antigen processing and presentation)	TGFB1	KEGG hsa04612
APAP (Antigen processing and presentation)	TGFB2	KEGG hsa04612
APAP (Antigen processing and presentation)	TGFB3	KEGG hsa04612
APAP (Antigen processing and presentation)	TGFBR1	KEGG hsa04612
APAP (Antigen processing and presentation)	TGFBR2	KEGG hsa04612
APAP (Antigen processing and presentation)	THBS1	KEGG hsa04612
APAP (Antigen processing and presentation)	THBS2	KEGG hsa04612
APAP (Antigen processing and presentation)	THBS3	KEGG hsa04612
APAP (Antigen processing and presentation)	THBS4	KEGG hsa04612
APAP (Antigen processing and presentation)	TNF	KEGG hsa04612
APAP (Antigen processing and presentation)	ZFYVE16	KEGG hsa04612
APAP (Antigen processing and presentation)	ZFYVE9	KEGG hsa04612
CD8 T-effector signature	CD8A	PMID: 26952546
CD8 T-effector signature	CXCL10	PMID: 26952546
CD8 T-effector signature	CXCL9	PMID: 26952546
CD8 T-effector signature	GZMA	PMID: 26952546
CD8 T-effector signature	GZMB	PMID: 26952546
CD8 T-effector signature	IFNG	PMID: 26952546
CD8 T-effector signature	PRF1	PMID: 26952546
CD8 T-effector signature	TBX21	PMID: 26952546
EMT 1 (Epithelial–mesenchymal transition 1)	CLDN3	PMID: 24520177
EMT 1 (Epithelial–mesenchymal transition 1)	CLDN7	PMID: 24520177
EMT 1 (Epithelial–mesenchymal transition 1)	CLDN4	PMID: 24520177
EMT 1 (Epithelial–mesenchymal transition 1)	CDH1	PMID: 24520177
EMT 1 (Epithelial–mesenchymal transition 1)	VIM	PMID: 24520177
EMT 1 (Epithelial–mesenchymal transition 1)	TWIST1	PMID: 24520177
EMT 1 (Epithelial–mesenchymal transition 1)	ZEB1	PMID: 24520177
EMT 1 (Epithelial–mesenchymal transition 1)	ZEB2	PMID: 24520177
EMT 2 (Epithelial–mesenchymal transition 2)	AXL	PMID: 26997480
EMT 2 (Epithelial–mesenchymal transition 2)	FAP	PMID: 26997480
EMT 2 (Epithelial–mesenchymal transition 2)	LOXL2	PMID: 26997480
EMT 2 (Epithelial–mesenchymal transition 2)	ROR2	PMID: 26997480
EMT 2 (Epithelial–mesenchymal transition 2)	TAGLN	PMID: 26997480
EMT 2 (Epithelial–mesenchymal transition 2)	TWIST2	PMID: 26997480
EMT 2 (Epithelial–mesenchymal transition 2)	WNT5A	PMID: 26997480
EMT 3 (Epithelial–mesenchymal transition 3)	FOXF1	PMID: 27321955
EMT 3 (Epithelial–mesenchymal transition 3)	GATA6	PMID: 27321955
EMT 3 (Epithelial–mesenchymal transition 3)	SOX9	PMID: 27321955
EMT 3 (Epithelial–mesenchymal transition 3)	TWIST1	PMID: 27321955
EMT 3 (Epithelial–mesenchymal transition 3)	ZEB1	PMID: 27321955
EMT 3 (Epithelial–mesenchymal transition 3)	ZEB2	PMID: 27321955
Angiogenesis	CDH5	PMID: 22553347
Angiogenesis	SOX17	PMID: 22553347
Angiogenesis	SOX18	PMID: 22553347
Angiogenesis	TEK	PMID: 22553347
TGF-β pathway	ACVR1	KEGG hsa04350
TGF-β pathway	ACVR1C	KEGG hsa04350
TGF-β pathway	ACVR2A	KEGG hsa04350
TGF-β pathway	ACVR2B	KEGG hsa04350
TGF-β pathway	ACVRL1	KEGG hsa04350
TGF-β pathway	AMH	KEGG hsa04350
TGF-β pathway	AMHR2	KEGG hsa04350
TGF-β pathway	BMP2	KEGG hsa04350
TGF-β pathway	BMP4	KEGG hsa04350
TGF-β pathway	BMP5	KEGG hsa04350
TGF-β pathway	BMP6	KEGG hsa04350
TGF-β pathway	BMP7	KEGG hsa04350
TGF-β pathway	BMP8A	KEGG hsa04350
TGF-β pathway	BMP8B	KEGG hsa04350
TGF-β pathway	BMPR1A	KEGG hsa04350
TGF-β pathway	BMPR1B	KEGG hsa04350
TGF-β pathway	BMPR2	KEGG hsa04350
TGF-β pathway	CDKN2B	KEGG hsa04350
TGF-β pathway	CHRD	KEGG hsa04350
TGF-β pathway	COMP	KEGG hsa04350
TGF-β pathway	CREBBP	KEGG hsa04350
TGF-β pathway	CUL1	KEGG hsa04350
TGF-β pathway	DCN	KEGG hsa04350
TGF-β pathway	E2F4	KEGG hsa04350
TGF-β pathway	E2F5	KEGG hsa04350
TGF-β pathway	EP300	KEGG hsa04350
TGF-β pathway	FST	KEGG hsa04350
TGF-β pathway	GDF5	KEGG hsa04350
TGF-β pathway	GDF6	KEGG hsa04350
TGF-β pathway	GDF7	KEGG hsa04350
TGF-β pathway	ID1	KEGG hsa04350
TGF-β pathway	ID2	KEGG hsa04350
TGF-β pathway	ID3	KEGG hsa04350
TGF-β pathway	ID4	KEGG hsa04350
TGF-β pathway	IFNG	KEGG hsa04350
TGF-β pathway	INHBA	KEGG hsa04350
TGF-β pathway	INHBB	KEGG hsa04350
TGF-β pathway	INHBC	KEGG hsa04350
TGF-β pathway	INHBE	KEGG hsa04350
TGF-β pathway	LEFTY1	KEGG hsa04350
TGF-β pathway	LEFTY2	KEGG hsa04350
TGF-β pathway	LTBP1	KEGG hsa04350
TGF-β pathway	MAPK1	KEGG hsa04350
TGF-β pathway	MAPK3	KEGG hsa04350
TGF-β pathway	MYC	KEGG hsa04350
TGF-β pathway	NODAL	KEGG hsa04350
TGF-β pathway	NOG	KEGG hsa04350
TGF-β pathway	PITX2	KEGG hsa04350
TGF-β pathway	PPP2CA	KEGG hsa04350
TGF-β pathway	PPP2CB	KEGG hsa04350
TGF-β pathway	PPP2R1A	KEGG hsa04350
TGF-β pathway	PPP2R1B	KEGG hsa04350
TGF-β pathway	RBL1	KEGG hsa04350
TGF-β pathway	RBL2	KEGG hsa04350
TGF-β pathway	RBX1	KEGG hsa04350
TGF-β pathway	RHOA	KEGG hsa04350
TGF-β pathway	ROCK1	KEGG hsa04350
TGF-β pathway	ROCK2	KEGG hsa04350
TGF-β pathway	RPS6KB1	KEGG hsa04350
TGF-β pathway	RPS6KB2	KEGG hsa04350
TGF-β pathway	SKP1	KEGG hsa04350
TGF-β pathway	SMAD1	KEGG hsa04350
TGF-β pathway	SMAD2	KEGG hsa04350
TGF-β pathway	SMAD3	KEGG hsa04350
TGF-β pathway	SMAD4	KEGG hsa04350
TGF-β pathway	SMAD5	KEGG hsa04350
TGF-β pathway	SMAD6	KEGG hsa04350
TGF-β pathway	SMAD7	KEGG hsa04350
TGF-β pathway	SMAD9	KEGG hsa04350
TGF-β pathway	SMURF1	KEGG hsa04350
TGF-β pathway	SMURF2	KEGG hsa04350
TGF-β pathway	SP1	KEGG hsa04350
TGF-β pathway	TFDP1	KEGG hsa04350
TGF-β pathway	TGFB1	KEGG hsa04350
TGF-β pathway	TGFB2	KEGG hsa04350
TGF-β pathway	TGFB3	KEGG hsa04350
TGF-β pathway	TGFBR1	KEGG hsa04350
TGF-β pathway	TGFBR2	KEGG hsa04350
TGF-β pathway	THBS1	KEGG hsa04350
TGF-β pathway	THBS2	KEGG hsa04350
TGF-β pathway	THBS3	KEGG hsa04350
TGF-β pathway	THBS4	KEGG hsa04350
TGF-β pathway	TNF	KEGG hsa04350
TGF-β pathway	ZFYVE16	KEGG hsa04350
TGF-β pathway	ZFYVE9	KEGG hsa04350
Wnt pathway	APC	KEGG hsa04310
Wnt pathway	APC2	KEGG hsa04310
Wnt pathway	AXIN1	KEGG hsa04310
Wnt pathway	AXIN2	KEGG hsa04310
Wnt pathway	BTRC	KEGG hsa04310
Wnt pathway	CACYBP	KEGG hsa04310
Wnt pathway	CAMK2A	KEGG hsa04310
Wnt pathway	CAMK2B	KEGG hsa04310
Wnt pathway	CAMK2D	KEGG hsa04310
Wnt pathway	CAMK2G	KEGG hsa04310
Wnt pathway	CCND1	KEGG hsa04310
Wnt pathway	CCND2	KEGG hsa04310
Wnt pathway	CCND3	KEGG hsa04310
Wnt pathway	CER1	KEGG hsa04310
Wnt pathway	CHD8	KEGG hsa04310
Wnt pathway	CHP1	KEGG hsa04310
Wnt pathway	CHP2	KEGG hsa04310
Wnt pathway	CREBBP	KEGG hsa04310
Wnt pathway	CSNK1A1	KEGG hsa04310
Wnt pathway	CSNK1A1L	KEGG hsa04310
Wnt pathway	CSNK1E	KEGG hsa04310
Wnt pathway	CSNK2A1	KEGG hsa04310
Wnt pathway	CSNK2A2	KEGG hsa04310
Wnt pathway	CSNK2B	KEGG hsa04310
Wnt pathway	CTBP1	KEGG hsa04310
Wnt pathway	CTBP2	KEGG hsa04310
Wnt pathway	CTNNB1	KEGG hsa04310
Wnt pathway	CTNNBIP1	KEGG hsa04310
Wnt pathway	CUL1	KEGG hsa04310
Wnt pathway	CXXC4	KEGG hsa04310
Wnt pathway	DAAM1	KEGG hsa04310
Wnt pathway	DAAM2	KEGG hsa04310
Wnt pathway	DKK1	KEGG hsa04310
Wnt pathway	DKK2	KEGG hsa04310
Wnt pathway	DKK4	KEGG hsa04310
Wnt pathway	DVL1	KEGG hsa04310
Wnt pathway	DVL2	KEGG hsa04310
Wnt pathway	DVL3	KEGG hsa04310
Wnt pathway	EP300	KEGG hsa04310
Wnt pathway	FBXW11	KEGG hsa04310
Wnt pathway	FOSL1	KEGG hsa04310
Wnt pathway	FRAT1	KEGG hsa04310
Wnt pathway	FRAT2	KEGG hsa04310
Wnt pathway	FZD1	KEGG hsa04310
Wnt pathway	FZD10	KEGG hsa04310
Wnt pathway	FZD2	KEGG hsa04310
Wnt pathway	FZD3	KEGG hsa04310
Wnt pathway	FZD4	KEGG hsa04310
Wnt pathway	FZD5	KEGG hsa04310
Wnt pathway	FZD6	KEGG hsa04310
Wnt pathway	FZD7	KEGG hsa04310
Wnt pathway	FZD8	KEGG hsa04310
Wnt pathway	FZD9	KEGG hsa04310
Wnt pathway	GSK3B	KEGG hsa04310
Wnt pathway	JUN	KEGG hsa04310
Wnt pathway	LEF1	KEGG hsa04310
Wnt pathway	LRP5	KEGG hsa04310
Wnt pathway	LRP6	KEGG hsa04310
Wnt pathway	MAP3K7	KEGG hsa04310
Wnt pathway	MAPK10	KEGG hsa04310
Wnt pathway	MAPK8	KEGG hsa04310
Wnt pathway	MAPK9	KEGG hsa04310
Wnt pathway	MMP7	KEGG hsa04310
Wnt pathway	MYC	KEGG hsa04310
Wnt pathway	NFAT5	KEGG hsa04310
Wnt pathway	NFATC1	KEGG hsa04310
Wnt pathway	NFATC2	KEGG hsa04310
Wnt pathway	NFATC3	KEGG hsa04310
Wnt pathway	NFATC4	KEGG hsa04310
Wnt pathway	NKD1	KEGG hsa04310
Wnt pathway	NKD2	KEGG hsa04310
Wnt pathway	NLK	KEGG hsa04310
Wnt pathway	PLCB1	KEGG hsa04310
Wnt pathway	PLCB2	KEGG hsa04310
Wnt pathway	PLCB3	KEGG hsa04310
Wnt pathway	PLCB4	KEGG hsa04310
Wnt pathway	PORCN	KEGG hsa04310
Wnt pathway	PPARD	KEGG hsa04310
Wnt pathway	PPP2CA	KEGG hsa04310
Wnt pathway	PPP2CB	KEGG hsa04310
Wnt pathway	PPP2R1A	KEGG hsa04310
Wnt pathway	PPP2R1B	KEGG hsa04310
Wnt pathway	PPP2R5A	KEGG hsa04310
Wnt pathway	PPP2R5B	KEGG hsa04310
Wnt pathway	PPP2R5C	KEGG hsa04310
Wnt pathway	PPP2R5D	KEGG hsa04310
Wnt pathway	PPP2R5E	KEGG hsa04310
Wnt pathway	PPP3CA	KEGG hsa04310
Wnt pathway	PPP3CB	KEGG hsa04310
Wnt pathway	PPP3CC	KEGG hsa04310
Wnt pathway	PPP3R1	KEGG hsa04310
Wnt pathway	PPP3R2	KEGG hsa04310
Wnt pathway	PRICKLE1	KEGG hsa04310
Wnt pathway	PRICKLE2	KEGG hsa04310
Wnt pathway	PRKACA	KEGG hsa04310
Wnt pathway	PRKACB	KEGG hsa04310
Wnt pathway	PRKACG	KEGG hsa04310
Wnt pathway	PRKCA	KEGG hsa04310
Wnt pathway	PRKCB	KEGG hsa04310
Wnt pathway	PRKCG	KEGG hsa04310
Wnt pathway	PRKX	KEGG hsa04310
Wnt pathway	PSEN1	KEGG hsa04310
Wnt pathway	RAC1	KEGG hsa04310
Wnt pathway	RAC2	KEGG hsa04310
Wnt pathway	RAC3	KEGG hsa04310
Wnt pathway	RBX1	KEGG hsa04310
Wnt pathway	RHOA	KEGG hsa04310
Wnt pathway	ROCK1	KEGG hsa04310
Wnt pathway	ROCK2	KEGG hsa04310
Wnt pathway	RUVBL1	KEGG hsa04310
Wnt pathway	SENP2	KEGG hsa04310
Wnt pathway	SFRP1	KEGG hsa04310
Wnt pathway	SFRP2	KEGG hsa04310
Wnt pathway	SFRP4	KEGG hsa04310
Wnt pathway	SFRP5	KEGG hsa04310
Wnt pathway	SIAH1	KEGG hsa04310
Wnt pathway	SKP1	KEGG hsa04310
Wnt pathway	SMAD2	KEGG hsa04310
Wnt pathway	SMAD3	KEGG hsa04310
Wnt pathway	SMAD4	KEGG hsa04310
Wnt pathway	SOX17	KEGG hsa04310
Wnt pathway	TBL1X	KEGG hsa04310
Wnt pathway	TBL1XR1	KEGG hsa04310
Wnt pathway	TBL1Y	KEGG hsa04310
Wnt pathway	TCF7	KEGG hsa04310
Wnt pathway	TCF7L1	KEGG hsa04310
Wnt pathway	TCF7L2	KEGG hsa04310
Wnt pathway	TP53	KEGG hsa04310
Wnt pathway	VANGL1	KEGG hsa04310
Wnt pathway	VANGL2	KEGG hsa04310
Wnt pathway	WIF1	KEGG hsa04310
Wnt pathway	WNT1	KEGG hsa04310
Wnt pathway	WNT10A	KEGG hsa04310
Wnt pathway	WNT10B	KEGG hsa04310
Wnt pathway	WNT11	KEGG hsa04310
Wnt pathway	WNT16	KEGG hsa04310
Wnt pathway	WNT2	KEGG hsa04310
Wnt pathway	WNT2B	KEGG hsa04310
Wnt pathway	WNT3	KEGG hsa04310
Wnt pathway	WNT3A	KEGG hsa04310
Wnt pathway	WNT4	KEGG hsa04310
Wnt pathway	WNT5A	KEGG hsa04310
Wnt pathway	WNT5B	KEGG hsa04310
Wnt pathway	WNT6	KEGG hsa04310
Wnt pathway	WNT7A	KEGG hsa04310
Wnt pathway	WNT7B	KEGG hsa04310
Wnt pathway	WNT8A	KEGG hsa04310
Wnt pathway	WNT8B	KEGG hsa04310
Wnt pathway	WNT9A	KEGG hsa04310
Wnt pathway	WNT9B	KEGG hsa04310
(DDR) DNA damage repair	ALKBH2	Wood lab
(DDR) DNA damage repair	ALKBH3	Wood lab
(DDR) DNA damage repair	APEX1	Wood lab
(DDR) DNA damage repair	APEX2	Wood lab
(DDR) DNA damage repair	APLF	Wood lab
(DDR) DNA damage repair	ATM	Wood lab
(DDR) DNA damage repair	ATR	Wood lab
(DDR) DNA damage repair	ATRIP	Wood lab
(DDR) DNA damage repair	BLM	Wood lab
(DDR) DNA damage repair	BRCA1	Wood lab
(DDR) DNA damage repair	BRCA2	Wood lab
(DDR) DNA damage repair	BRIP1	Wood lab
(DDR) DNA damage repair	CCNH	Wood lab
(DDR) DNA damage repair	CDK7	Wood lab
(DDR) DNA damage repair	CETN2	Wood lab
(DDR) DNA damage repair	CHAF1A	Wood lab
(DDR) DNA damage repair	CHEK1	Wood lab
(DDR) DNA damage repair	CHEK2	Wood lab
(DDR) DNA damage repair	CLK2	Wood lab
(DDR) DNA damage repair	DCLRE1C	Wood lab
(DDR) DNA damage repair	DDB1	Wood lab
(DDR) DNA damage repair	DDB2	Wood lab
(DDR) DNA damage repair	DUT	Wood lab
(DDR) DNA damage repair	ENDOV	Wood lab
(DDR) DNA damage repair	ERCC1	Wood lab
(DDR) DNA damage repair	ERCC2	Wood lab
(DDR) DNA damage repair	ERCC3	Wood lab
(DDR) DNA damage repair	ERCC4	Wood lab
(DDR) DNA damage repair	ERCC5	Wood lab
(DDR) DNA damage repair	ERCC6	Wood lab
(DDR) DNA damage repair	ERCC8	Wood lab
(DDR) DNA damage repair	FAN1	Wood lab
(DDR) DNA damage repair	FANCA	Wood lab
(DDR) DNA damage repair	FANCB	Wood lab
(DDR) DNA damage repair	FANCC	Wood lab
(DDR) DNA damage repair	FANCD2	Wood lab
(DDR) DNA damage repair	FANCE	Wood lab
(DDR) DNA damage repair	FANCF	Wood lab
(DDR) DNA damage repair	FANCG	Wood lab
(DDR) DNA damage repair	FANCL	Wood lab
(DDR) DNA damage repair	FANCM	Wood lab
(DDR) DNA damage repair	GTF2H1	Wood lab
(DDR) DNA damage repair	GTF2H2	Wood lab
(DDR) DNA damage repair	GTF2H3	Wood lab
(DDR) DNA damage repair	GTF2H4	Wood lab
(DDR) DNA damage repair	GTF2H5	Wood lab
(DDR) DNA damage repair	H2AFX	Wood lab
(DDR) DNA damage repair	HLTF	Wood lab
(DDR) DNA damage repair	HUS1	Wood lab
(DDR) DNA damage repair	LIG1	Wood lab
(DDR) DNA damage repair	LIG3	Wood lab
(DDR) DNA damage repair	LIG4	Wood lab
(DDR) DNA damage repair	MBD4	Wood lab
(DDR) DNA damage repair	MDC1	Wood lab
(DDR) DNA damage repair	MGMT	Wood lab
(DDR) DNA damage repair	MLH1	Wood lab
(DDR) DNA damage repair	MLH3	Wood lab
(DDR) DNA damage repair	MMS19	Wood lab
(DDR) DNA damage repair	MNAT1	Wood lab
(DDR) DNA damage repair	MPG	Wood lab
(DDR) DNA damage repair	MSH2	Wood lab
(DDR) DNA damage repair	MSH3	Wood lab
(DDR) DNA damage repair	MSH4	Wood lab
(DDR) DNA damage repair	MSH5	Wood lab
(DDR) DNA damage repair	MSH6	Wood lab
(DDR) DNA damage repair	MUTYH	Wood lab
(DDR) DNA damage repair	NEIL1	Wood lab
(DDR) DNA damage repair	NEIL2	Wood lab
(DDR) DNA damage repair	NEIL3	Wood lab
(DDR) DNA damage repair	NHEJ1	Wood lab
(DDR) DNA damage repair	NTHL1	Wood lab
(DDR) DNA damage repair	NUDT1	Wood lab
(DDR) DNA damage repair	OGG1	Wood lab
(DDR) DNA damage repair	PALB2	Wood lab
(DDR) DNA damage repair	PARP1	Wood lab
(DDR) DNA damage repair	PARP2	Wood lab
(DDR) DNA damage repair	PARP3	Wood lab
(DDR) DNA damage repair	PCNA	Wood lab
(DDR) DNA damage repair	PER1	Wood lab
(DDR) DNA damage repair	PMS1	Wood lab
(DDR) DNA damage repair	PMS2	Wood lab
(DDR) DNA damage repair	PNKP	Wood lab
(DDR) DNA damage repair	POLB	Wood lab
(DDR) DNA damage repair	POLD1	Wood lab
(DDR) DNA damage repair	POLE	Wood lab
(DDR) DNA damage repair	POLG	Wood lab
(DDR) DNA damage repair	POLH	Wood lab
(DDR) DNA damage repair	POLL	Wood lab
(DDR) DNA damage repair	POLM	Wood lab
(DDR) DNA damage repair	POLQ	Wood lab
(DDR) DNA damage repair	PRKDC	Wood lab
(DDR) DNA damage repair	RAD1	Wood lab
(DDR) DNA damage repair	RAD17	Wood lab
(DDR) DNA damage repair	RAD18	Wood lab
(DDR) DNA damage repair	RAD23A	Wood lab
(DDR) DNA damage repair	RAD23B	Wood lab
(DDR) DNA damage repair	RAD51C	Wood lab
(DDR) DNA damage repair	RAD9A	Wood lab
(DDR) DNA damage repair	RECQL4	Wood lab
(DDR) DNA damage repair	RECQL5	Wood lab
(DDR) DNA damage repair	RIF1	Wood lab
(DDR) DNA damage repair	RNF168	Wood lab
(DDR) DNA damage repair	RNF4	Wood lab
(DDR) DNA damage repair	RNF8	Wood lab
(DDR) DNA damage repair	RPA1	Wood lab
(DDR) DNA damage repair	RPA2	Wood lab
(DDR) DNA damage repair	RPA3	Wood lab
(DDR) DNA damage repair	RPA4	Wood lab
(DDR) DNA damage repair	RRM2B	Wood lab
(DDR) DNA damage repair	SETMAR	Wood lab
(DDR) DNA damage repair	SHPRH	Wood lab
(DDR) DNA damage repair	SMUG1	Wood lab
(DDR) DNA damage repair	TDP1	Wood lab
(DDR) DNA damage repair	TDP2	Wood lab
(DDR) DNA damage repair	TOPBP1	Wood lab
(DDR) DNA damage repair	TP53	Wood lab
(DDR) DNA damage repair	TREX1	Wood lab
(DDR) DNA damage repair	UBE2A	Wood lab
(DDR) DNA damage repair	UBE2B	Wood lab
(DDR) DNA damage repair	UBE2N	Wood lab
(DDR) DNA damage repair	UBE2V2	Wood lab
(DDR) DNA damage repair	UNG	Wood lab
(DDR) DNA damage repair	UVSSA	Wood lab
(DDR) DNA damage repair	WRN	Wood lab
(DDR) DNA damage repair	XAB2	Wood lab
(DDR) DNA damage repair	XPA	Wood lab
(DDR) DNA damage repair	XPC	Wood lab
(DDR) DNA damage repair	XRCC1	Wood lab
(DDR) DNA damage repair	XRCC4	Wood lab
(DDR) DNA damage repair	XRCC5	Wood lab
(DDR) DNA damage repair	XRCC6	Wood lab
NER (Nucleotide excision repair)	CCNH	KEGG hsa3420
NER (Nucleotide excision repair)	CDK7	KEGG hsa3420
NER (Nucleotide excision repair)	CETN2	KEGG hsa3420
NER (Nucleotide excision repair)	CUL4A	KEGG hsa3420
NER (Nucleotide excision repair)	CUL4B	KEGG hsa3420
NER (Nucleotide excision repair)	DDB1	KEGG hsa3420
NER (Nucleotide excision repair)	DDB2	KEGG hsa3420
NER (Nucleotide excision repair)	ERCC1	KEGG hsa3420
NER (Nucleotide excision repair)	ERCC2	KEGG hsa3420
NER (Nucleotide excision repair)	ERCC3	KEGG hsa3420
NER (Nucleotide excision repair)	ERCC4	KEGG hsa3420
NER (Nucleotide excision repair)	ERCC5	KEGG hsa3420
NER (Nucleotide excision repair)	ERCC6	KEGG hsa3420
NER (Nucleotide excision repair)	ERCC8	KEGG hsa3420
NER (Nucleotide excision repair)	GTF2H1	KEGG hsa3420
NER (Nucleotide excision repair)	GTF2H2	KEGG hsa3420
NER (Nucleotide excision repair)	GTF2H3	KEGG hsa3420
NER (Nucleotide excision repair)	GTF2H4	KEGG hsa3420
NER (Nucleotide excision repair)	GTF2H5	KEGG hsa3420
NER (Nucleotide excision repair)	LIG1	KEGG hsa3420
NER (Nucleotide excision repair)	MNAT1	KEGG hsa3420
NER (Nucleotide excision repair)	PCNA	KEGG hsa3420
NER (Nucleotide excision repair)	POLD1	KEGG hsa3420
NER (Nucleotide excision repair)	POLD2	KEGG hsa3420
NER (Nucleotide excision repair)	POLD3	KEGG hsa3420
NER (Nucleotide excision repair)	POLD4	KEGG hsa3420
NER (Nucleotide excision repair)	POLE	KEGG hsa3420
NER (Nucleotide excision repair)	POLE2	KEGG hsa3420
NER (Nucleotide excision repair)	POLE3	KEGG hsa3420
NER (Nucleotide excision repair)	POLE4	KEGG hsa3420
NER (Nucleotide excision repair)	RAD23A	KEGG hsa3420
NER (Nucleotide excision repair)	RAD23B	KEGG hsa3420
NER (Nucleotide excision repair)	RBX1	KEGG hsa3420
NER (Nucleotide excision repair)	RFC1	KEGG hsa3420
NER (Nucleotide excision repair)	RFC2	KEGG hsa3420
NER (Nucleotide excision repair)	RFC3	KEGG hsa3420
NER (Nucleotide excision repair)	RFC4	KEGG hsa3420
NER (Nucleotide excision repair)	RFC5	KEGG hsa3420
NER (Nucleotide excision repair)	RPA1	KEGG hsa3420
NER (Nucleotide excision repair)	RPA2	KEGG hsa3420
NER (Nucleotide excision repair)	RPA3	KEGG hsa3420
NER (Nucleotide excision repair)	RPA4	KEGG hsa3420
NER (Nucleotide excision repair)	XPA	KEGG hsa3420
NER (Nucleotide excision repair)	XPC	KEGG hsa3420
DNA replication	DNA2	KEGG hsa3030
DNA replication	FEN1	KEGG hsa3030
DNA replication	LIG1	KEGG hsa3030
DNA replication	MCM2	KEGG hsa3030
DNA replication	MCM3	KEGG hsa3030
DNA replication	MCM4	KEGG hsa3030
DNA replication	MCM5	KEGG hsa3030
DNA replication	MCM6	KEGG hsa3030
DNA replication	MCM7	KEGG hsa3030
DNA replication	PCNA	KEGG hsa3030
DNA replication	POLA1	KEGG hsa3030
DNA replication	POLA2	KEGG hsa3030
DNA replication	POLD1	KEGG hsa3030
DNA replication	POLD2	KEGG hsa3030
DNA replication	POLD3	KEGG hsa3030
DNA replication	POLD4	KEGG hsa3030
DNA replication	POLE	KEGG hsa3030
DNA replication	POLE2	KEGG hsa3030
DNA replication	POLE3	KEGG hsa3030
DNA replication	POLE4	KEGG hsa3030
DNA replication	PRIM1	KEGG hsa3030
DNA replication	PRIM2	KEGG hsa3030
DNA replication	RFC1	KEGG hsa3030
DNA replication	RFC2	KEGG hsa3030
DNA replication	RFC3	KEGG hsa3030
DNA replication	RFC4	KEGG hsa3030
DNA replication	RFC5	KEGG hsa3030
DNA replication	RNASEH1	KEGG hsa3030
DNA replication	RNASEH2A	KEGG hsa3030
DNA replication	RNASEH2B	KEGG hsa3030
DNA replication	RNASEH2C	KEGG hsa3030
DNA replication	RPA1	KEGG hsa3030
DNA replication	RPA2	KEGG hsa3030
DNA replication	RPA3	KEGG hsa3030
DNA replication	RPA4	KEGG hsa3030
DNA replication	SSBP1	KEGG hsa3030
Cell cycle	ABL1	KEGG hsa4110
Cell cycle	ANAPC1	KEGG hsa4110
Cell cycle	ANAPC10	KEGG hsa4110
Cell cycle	ANAPC11	KEGG hsa4110
Cell cycle	ANAPC13	KEGG hsa4110
Cell cycle	ANAPC2	KEGG hsa4110
Cell cycle	ANAPC4	KEGG hsa4110
Cell cycle	ANAPC5	KEGG hsa4110
Cell cycle	ANAPC7	KEGG hsa4110
Cell cycle	ATM	KEGG hsa4110
Cell cycle	ATR	KEGG hsa4110
Cell cycle	BUB1	KEGG hsa4110
Cell cycle	BUB1B	KEGG hsa4110
Cell cycle	BUB3	KEGG hsa4110
Cell cycle	CCNA1	KEGG hsa4110
Cell cycle	CCNA2	KEGG hsa4110
Cell cycle	CCNB1	KEGG hsa4110
Cell cycle	CCNB2	KEGG hsa4110
Cell cycle	CCNB3	KEGG hsa4110
Cell cycle	CCND1	KEGG hsa4110
Cell cycle	CCND2	KEGG hsa4110
Cell cycle	CCND3	KEGG hsa4110
Cell cycle	CCNE1	KEGG hsa4110
Cell cycle	CCNE2	KEGG hsa4110
Cell cycle	CCNH	KEGG hsa4110
Cell cycle	CDC14A	KEGG hsa4110
Cell cycle	CDC14B	KEGG hsa4110
Cell cycle	CDC16	KEGG hsa4110
Cell cycle	CDC20	KEGG hsa4110
Cell cycle	CDC23	KEGG hsa4110
Cell cycle	CDC25A	KEGG hsa4110
Cell cycle	CDC25B	KEGG hsa4110
Cell cycle	CDC25C	KEGG hsa4110
Cell cycle	CDC26	KEGG hsa4110
Cell cycle	CDC27	KEGG hsa4110
Cell cycle	CDC45	KEGG hsa4110
Cell cycle	CDC6	KEGG hsa4110
Cell cycle	CDC7	KEGG hsa4110
Cell cycle	CDK1	KEGG hsa4110
Cell cycle	CDK2	KEGG hsa4110
Cell cycle	CDK4	KEGG hsa4110
Cell cycle	CDK6	KEGG hsa4110
Cell cycle	CDK7	KEGG hsa4110
Cell cycle	CDKN1A	KEGG hsa4110
Cell cycle	CDKN1B	KEGG hsa4110
Cell cycle	CDKN1C	KEGG hsa4110
Cell cycle	CDKN2A	KEGG hsa4110
Cell cycle	CDKN2B	KEGG hsa4110
Cell cycle	CDKN2C	KEGG hsa4110
Cell cycle	CDKN2D	KEGG hsa4110
Cell cycle	CHEK1	KEGG hsa4110
Cell cycle	CHEK2	KEGG hsa4110
Cell cycle	CREBBP	KEGG hsa4110
Cell cycle	CUL1	KEGG hsa4110
Cell cycle	DBF4	KEGG hsa4110
Cell cycle	E2F1	KEGG hsa4110
Cell cycle	E2F2	KEGG hsa4110
Cell cycle	E2F3	KEGG hsa4110
Cell cycle	E2F4	KEGG hsa4110
Cell cycle	E2F5	KEGG hsa4110
Cell cycle	EP300	KEGG hsa4110
Cell cycle	ESPL1	KEGG hsa4110
Cell cycle	FZR1	KEGG hsa4110
Cell cycle	GADD45A	KEGG hsa4110
Cell cycle	GADD45B	KEGG hsa4110
Cell cycle	GADD45G	KEGG hsa4110
Cell cycle	GSK3B	KEGG hsa4110
Cell cycle	HDAC1	KEGG hsa4110
Cell cycle	HDAC2	KEGG hsa4110
Cell cycle	MAD1L1	KEGG hsa4110
Cell cycle	MAD2L1	KEGG hsa4110
Cell cycle	MAD2L2	KEGG hsa4110
Cell cycle	MCM2	KEGG hsa4110
Cell cycle	MCM3	KEGG hsa4110
Cell cycle	MCM4	KEGG hsa4110
Cell cycle	MCM5	KEGG hsa4110
Cell cycle	MCM6	KEGG hsa4110
Cell cycle	MCM7	KEGG hsa4110
Cell cycle	MDM2	KEGG hsa4110
Cell cycle	MYC	KEGG hsa4110
Cell cycle	ORC1	KEGG hsa4110
Cell cycle	ORC2	KEGG hsa4110
Cell cycle	ORC3	KEGG hsa4110
Cell cycle	ORC4	KEGG hsa4110
Cell cycle	ORC5	KEGG hsa4110
Cell cycle	ORC6	KEGG hsa4110
Cell cycle	PCNA	KEGG hsa4110
Cell cycle	PKMYT1	KEGG hsa4110
Cell cycle	PLK1	KEGG hsa4110
Cell cycle	PRKDC	KEGG hsa4110
Cell cycle	PTTG1	KEGG hsa4110
Cell cycle	PTTG2	KEGG hsa4110
Cell cycle	RAD21	KEGG hsa4110
Cell cycle	RB1	KEGG hsa4110
Cell cycle	RBL1	KEGG hsa4110
Cell cycle	RBL2	KEGG hsa4110
Cell cycle	RBX1	KEGG hsa4110
Cell cycle	SFN	KEGG hsa4110
Cell cycle	SKP1	KEGG hsa4110
Cell cycle	SKP2	KEGG hsa4110
Cell cycle	SMAD2	KEGG hsa4110
Cell cycle	SMAD3	KEGG hsa4110
Cell cycle	SMAD4	KEGG hsa4110
Cell cycle	SMC1A	KEGG hsa4110
Cell cycle	SMC1B	KEGG hsa4110
Cell cycle	SMC3	KEGG hsa4110
Cell cycle	STAG1	KEGG hsa4110
Cell cycle	STAG2	KEGG hsa4110
Cell cycle	TFDP1	KEGG hsa4110
Cell cycle	TFDP2	KEGG hsa4110
Cell cycle	TGFB1	KEGG hsa4110
Cell cycle	TGFB2	KEGG hsa4110
Cell cycle	TGFB3	KEGG hsa4110
Cell cycle	TP53	KEGG hsa4110
Cell cycle	TTK	KEGG hsa4110
Cell cycle	WEE1	KEGG hsa4110
Cell cycle	WEE2	KEGG hsa4110
Cell cycle	YWHAB	KEGG hsa4110
Cell cycle	YWHAE	KEGG hsa4110
Cell cycle	YWHAG	KEGG hsa4110
Cell cycle	YWHAH	KEGG hsa4110
Cell cycle	YWHAQ	KEGG hsa4110
Cell cycle	YWHAZ	KEGG hsa4110
Cell cycle	ZBTB17	KEGG hsa4110

## Sheet: TableS5
Table-S5: Spearman correlation analysis of the 21 m6A modification regulators
m6A regulators	WTAP	KIAA1429	RBM15	RBM15B	METTL3	METTL14	METTL16	ZC3H13	HNRNPC	HNRNPA2B1	HNRNPG	YTHDF1	YTHDF2	YTHDF3	YTHDC1	YTHDC2	IGF2BP1	IGF2BP2	IGF2BP3	EIF3A	FTO	ALKBH5
WTAP	1	0.452085	0.586195	0.547125	0.541257	0.411859	0.436843	0.425724	0.664434	0.696527	0.689822	0.628058	0.641945	0.458067	0.658957	0.476876	0.226712	0.320847	0.420758	0.501159	0.448818	0.348894
KIAA1429	0.452085	1	0.4793	0.57784	0.650565	0.440423	0.374285	0.336229	0.633078	0.594635	0.60015	0.558017	0.491274	0.720956	0.539529	0.427544	0.36136	0.390294	0.396293	0.618025	0.386737	0.382112
RBM15	0.586195	0.4793	1	0.612177	0.511906	0.533136	0.490964	0.368802	0.600746	0.674796	0.651294	0.651702	0.696729	0.486497	0.647587	0.477434	0.161281	0.203735	0.323899	0.477417	0.483363	0.422999
RBM15B	0.547125	0.57784	0.612177	1	0.713738	0.546005	0.527261	0.36612	0.730862	0.738507	0.758038	0.813762	0.681109	0.482553	0.703178	0.473981	0.359085	0.380645	0.441541	0.606542	0.457634	0.485812
METTL3	0.541257	0.650565	0.511906	0.713738	1	0.555374	0.397188	0.44372	0.751888	0.754184	0.7415	0.677198	0.579717	0.524076	0.677119	0.514403	0.337937	0.334063	0.430042	0.633875	0.530366	0.456797
METTL14	0.411859	0.440423	0.533136	0.546005	0.555374	1	0.355428	0.643377	0.544605	0.589088	0.543403	0.541192	0.547328	0.596439	0.738199	0.606381	0.0480278	0.048863	0.250095	0.6489	0.631718	0.454717
METTL16	0.436843	0.374285	0.490964	0.527261	0.397188	0.355428	1	0.313909	0.491037	0.513541	0.591206	0.543616	0.412851	0.35069	0.556146	0.298617	0.314532	0.371474	0.231713	0.368719	0.350993	0.471195
ZC3H13	0.425724	0.336229	0.368802	0.36612	0.44372	0.643377	0.313908	1	0.465961	0.499769	0.420844	0.398704	0.451556	0.53293	0.669159	0.597669	0	0.0557895	0.196271	0.608579	0.634042	0.319568
HNRNPC	0.664434	0.633078	0.600746	0.730862	0.751888	0.544605	0.491037	0.465961	1	0.836416	0.841449	0.724843	0.675078	0.510464	0.79381	0.525862	0.317227	0.436444	0.424767	0.649957	0.505979	0.466449
HNRNPA2B1	0.696527	0.594635	0.674796	0.738507	0.754184	0.589088	0.513541	0.499769	0.836416	1	0.853165	0.785532	0.712368	0.53605	0.822231	0.625217	0.330374	0.387228	0.48953	0.686429	0.576382	0.497575
HNRNPG	0.689822	0.60015	0.651294	0.758038	0.7415	0.543403	0.591206	0.420844	0.841449	0.853165	1	0.762873	0.659207	0.463211	0.80806	0.554599	0.413202	0.458478	0.478305	0.658574	0.503705	0.478227
YTHDF1	0.628058	0.558017	0.651702	0.813762	0.677198	0.541192	0.543616	0.398704	0.724843	0.785532	0.762873	1	0.655587	0.505074	0.743451	0.554636	0.3085	0.36643	0.438372	0.63522	0.528842	0.533817
YTHDF2	0.641945	0.491274	0.696729	0.681109	0.579717	0.547328	0.412851	0.451556	0.675078	0.712368	0.659207	0.655587	1	0.521789	0.702667	0.561417	0.167274	0.204942	0.411592	0.576453	0.590605	0.414384
YTHDF3	0.458067	0.720956	0.486497	0.482553	0.524076	0.596439	0.35069	0.53293	0.510464	0.53605	0.463211	0.505074	0.521789	1	0.613311	0.5587	0.100469	0.15257	0.223529	0.642305	0.496306	0.406639
YTHDC1	0.658957	0.539529	0.647587	0.703178	0.677119	0.738199	0.556146	0.669159	0.79381	0.822231	0.80806	0.743451	0.702667	0.613311	1	0.693601	0.20035	0.28499	0.416379	0.761558	0.679075	0.492911
YTHDC2	0.476876	0.427544	0.477434	0.473981	0.514403	0.606381	0.298617	0.597669	0.525862	0.625217	0.554599	0.554636	0.561417	0.5587	0.693601	1	0.033236	0.130557	0.377422	0.717577	0.620445	0.314893
IGF2BP1	0.226712	0.36136	0.161281	0.359085	0.337937	0.0480278	0.314532	0	0.317227	0.330374	0.413202	0.308501	0.167274	0.100469	0.20035	0.033236	1	0.589993	0.41498	0.223113	0	0.183809
IGF2BP2	0.320847	0.390294	0.203735	0.380645	0.334063	0.048863	0.371474	0.0557895	0.436444	0.387228	0.458478	0.36643	0.204942	0.15257	0.28499	0.130557	0.589993	1	0.46379	0.258134	0	0.187937
IGF2BP3	0.420758	0.396293	0.323899	0.441541	0.430042	0.250095	0.231713	0.196271	0.424767	0.48953	0.478305	0.438372	0.411592	0.223529	0.416379	0.377422	0.41498	0.46379	1	0.455331	0.23656	0.144943
EIF3A	0.501159	0.618025	0.477417	0.606542	0.633875	0.6489	0.368719	0.608578	0.649957	0.686429	0.658574	0.63522	0.576453	0.642305	0.761558	0.717577	0.223113	0.258135	0.455331	1	0.64129	0.424569
FTO	0.448818	0.386737	0.483363	0.457634	0.530366	0.631718	0.350993	0.634042	0.505979	0.576382	0.503705	0.528842	0.590605	0.496306	0.679075	0.620446	0	0	0.23656	0.64129	1	0.415341
ALKBH5	0.348894	0.382112	0.422999	0.485812	0.456797	0.454717	0.471195	0.319568	0.466449	0.497575	0.478227	0.533817	0.414384	0.406639	0.492911	0.314893	0.183808	0.187937	0.144943	0.424569	0.415341	1

## Sheet: TableS6
Table-S6: Clinical Characteristics of patients with m6A clusters in TCGA cohort
Variable	Cluster1	Cluster2	Cluster3	P-value
	N=126	N=125	N=116
Median age (%)				0.0015359
≤55years	46 (37)	74 (37)	55 (47)
>55years	80 (63)	51 (63)	61 (53)
Gender (%)				0.372846
Male	91 (72)	80 (63)	78 (67)
Female	35 (28)	45 (37)	38 (33)
Alcohol consumption (%)				0.093739
No	77 (61)	92 (74)	81 (70)
Yes	49 (39)	33 (26)	35 (30)
Virus infection (%)				0.202062
HBV	26 (23)	35 (28)	40 (34)
HCV	23 (21)	16 (13)	14 (12)
HBV/HCV	3 (2)	4 (3)	1 (1)
No infection	74 (59)	78 (62)	61 (53)
Vascular invasion (%)				2.00871e-05
No	69 (55)	40 (32)	73 (63)
Yes	35 (28)	61 (49)	34 (29)
Family history (%)				0.402596
No	66 (52)	71 (57)	70 (60)
Yes	42 (33)	37 (30)	30 (26)
AFP level (%)				1.9587e-08
Low(≤300ng)	88 (70)	51 (41)	71 (61)
High(>300ng)	4 (3)	37 (30)	25 (22)
Histologic grade (%)				5.5731e-06
G1/G2	99 (79)	67 (54)	63 (54)
G3/G4	24 (19)	57 (46)	53 (46)
TNM stage (%)				3.53817e-05
I/II	86 (68)	67 (54)	89 (77)
III/IV	29 (23)	57 (46)	23 (20)
m6A gene cluster				8.1847e-24
m6A gene cluster A	57 (46)	6 (5)	62 (53)
m6A gene cluster B	25 (20)	80 (64)	11 (9)
m6A gene cluster C	44 (36)	39 (31)	43 (37)
m6A score				3.89365e-17
Low (<57.1)	87 (69)	23 (18)	33 (28)
High (>57.1)	39 (31)	102 (82)	83 (72)
AFP, α-fetoprotein; TCGA, the Cancer Genome Atlas; TNM, tumor node metastasis

## Sheet: TableS7
Table-S7: The activation states of biological pathways in distinct m6A clusters by GSVA enrichment analysis
Pathway of m6Acluster 1 VS m6Acluster 2	m6Acluster.B	m6Acluster.C	P value
CYTOKINE_CYTOKINE_RECEPTOR_INTERACTION	0.0205044	-0.0815582	0.00413739
ANTIGEN_PROCESSING_AND_PRESENTATION	0.0216023	-0.0612857	0.0361697
APOPTOSIS	0.00214016	-0.0670173	0.011819
B_CELL_RECEPTOR_SIGNALING_PATHWAY	-0.0228033	-0.267017	2.49102e-14
CELL_CYCLE	-0.151162	0.182449	7.23329e-19
MAPK_SIGNALING_PATHWAY	-0.032525	0.0389481	0.000272159
NUCLEOTIDE_EXCISION_REPAIR	-0.103027	-0.211052	0.000585169
P53_SIGNALING_PATHWAY	-0.0157262	0.0411585	0.0124384
PANCREATIC_CANCER	-0.0522258	0.124904	1.04942e-09
PATHWAYS_IN_CANCER	-0.0461948	0.0647574	4.62435e-07
T_CELL_RECEPTOR_SIGNALING_PATHWAY	-0.0455099	-0.135243	0.00120166
WNT_SIGNALING_PATHWAY	-0.0709083	0.0627609	3.28982e-09
Pathway of m6Acluster 1 VS m6Acluster 3	m6Acluster.B	m6Acluster.C	P value
ANTIGEN_PROCESSING_AND_PRESENTATION	0.0216023	0.0884995	0.0930036
APOPTOSIS	0.00214016	-0.113611	5.17129e-05
B_CELL_RECEPTOR_SIGNALING_PATHWAY	-0.0228033	-0.0990591	0.0228542
BASE_EXCISION_REPAIR	-0.120026	0.000940861	0.00148356
DNA_REPLICATION	-0.191147	-0.0793574	0.027234
FATTY_ACID_METABOLISM	0.269834	0.370643	0.0463935
NUCLEOTIDE_EXCISION_REPAIR	-0.103027	-0.187265	0.0527282
OXIDATIVE_PHOSPHORYLATION	0.00771404	0.0681069	0.214357
PPAR_SIGNALING_PATHWAY	0.182757	0.268107	0.0413638
T_CELL_RECEPTOR_SIGNALING_PATHWAY	-0.0455099	-0.091745	0.156417
TGF_BETA_SIGNALING_PATHWAY	-0.0436443	0.108255	3.07211e-07
VEGF_SIGNALING_PATHWAY	-0.0573716	0.158255	1.97565e-14

## Sheet: TableS8
Table-S8: Clinical Characteristics of patients with m6A clusters in TCGA cohort
Variable	Cluster1	Cluster2	Cluster3	P-value
	N=73	N=62	N=68
Age (%)				0.54998
≤Median	33 (37)	31 (50)	37 (54)
>Median	40 (63)	31 (50)	31 (46)
Gender (%)				0.93823
Male	54 (72)	47 (76)	52 (76)
Female	19 (28)	15 (24)	16 (24)
HBV infection (%)				0.80773
No	61 (84)	41 (66)	44 (65)
Yes	12 (16)	21 (34)	24 (35)
HCV infection (%)				0.80773
No	26 (36)	23 (37)	16 (24)
Yes	47 (64)	39 (63)	35 (51)
TNM stage (%)				0.00233775
I/II	55 (75)	29 (47)	45 (66)
III/IV	18 (25)	33 (53)	23 (34)
AFP, α-fetoprotein; TCGA, the Cancer Genome Atlas; TNM, tumor node metastasis

## Sheet: TableS9
Table-S9: Clinical Characteristics of patients with m6A gene clusters in TCGA cohort
Variable	Genecluster A	Genecluster B	Genecluster C	P-value
	N=125	N=116	N=126
Median age (%)				0.545255
≤55years	56 (45)	60 (48)	59 (47)
>55years	69 (55)	56 (45)	67 (54)
Gender (%)				0.0249722
Male	96 (77)	71 (57)	82 (66)
Female	29 (23)	45 (36)	44 (35)
Alcohol consumption (%)				0.615478
No	84 (67)	83 (66)	83 (66)
Yes	41 (33)	33 (26)	43 (34)
Virus infection (%)				0.35092
HBV	42 (34)	27 (22)	28 (22)
HCV	19 (15)	15 (12)	17 (14)
HBV/HCV	2 (2)	2 (2)	3 (2)
No infection	62 (50)	74 (29)	78 (62)
Vascular invasion (%)				0.470559
No	80 (64)	56 (45)	67 (54)
Yes	36 (29)	36 (29)	37 (30)
Family history (%)				0.85379
No	71 (57)	66 (53)	70 (56)
Yes	34 (27)	36 (29)	39 (31)
AFP level (%)				0.0229617
Low(≤300ng)	85 (68)	52 (42)	73 (58)
High(>300ng)	17 (14)	27 (22)	22 (18)
Histologic grade (%)				0.00435979
G1/G2	87 (70)	58 (46)	84 (67)
G3/G4	37 (30)	56 (45)	41 (33)
TNM stage (%)				0.00235242
I/II	98 (78)	67 (54)	89 (71)
III/IV	23 (18)	41 (33)	25 (20)
m6A score				1.49903e-06
Low (<57.1)	63 (50)	23 (18)	57 (46)
High (>57.1)	62 (50)	93 (74)	69 (55)
AFP, α-fetoprotein; TCGA, the Cancer Genome Atlas; TNM, tumor node metastasis

## Sheet: TableS10
Table-S10: The post-hoc comparisons of ANOVAs, Kruskal-Wallis and log rank test in TCGA and ICGC cohort
TCGA-C1 VS C2					TCGA-C1 VS C3					TCGA-C2 VS C3					HCCDB-C1 VS C2					HCCDB-C1 VS C3					HCCDB-C2 VS C3
Variables	FC	P.value	P.adjust		Variables	FC	P.value	P.adjust		Variables	FC	P.value	P.adjust		Variables	FC	P.value	P.adjust		Variables	FC	P.value	P.adjust		Variables	FC	P.value	P.adjust
YTHDC2	0.96393	6.45421e-05	0.000146528		YTHDC2	1.05208	2.0049e-05	0.000240588		YTHDC2	1.09145	1.37237e-13	1.04799e-12		WTAP	0.884127	4.28534e-08	1.40464e-07		WTAP	0.944269	0.00450152	0.0115474		WTAP	1.06802	0.000690765	0.00205985
FTO	0.980328	0.0360746	0.0531625		FTO	1.05341	4.50352e-06	7.56592e-05		FTO	1.07455	1.37687e-10	5.78284e-10		KIAA1429	0.807313	2.18996e-13	1.43564e-12		KIAA1429	0.809601	1.03512e-16	1.52681e-15		KIAA1429	1.00283	0.905623	0.939881
HNRNPC	0.955835	8.08813e-18	1.13234e-16		HNRNPC	0.999455	0.919397	0.941821		HNRNPC	1.04563	9.69415e-17	1.57282e-15		RBM15	0.874022	0.00244458	0.00450719		RBM15	0.867445	0.00010161	0.000333056		RBM15	0.992475	0.845692	0.907197
ZBP1	0.891101	0.0113545	0.0183419		ZBP1	1.01257	0.785117	0.867761		ZBP1	1.13631	0.00602458	0.00973201		RBM15B	0.765698	1.91188e-18	5.64004e-17		RBM15B	0.899404	6.79622e-05	0.000250611		RBM15B	1.17462	6.60571e-12	1.94868e-10
EIF3A	0.938225	6.0961e-14	3.93902e-13		EIF3A	1.02827	0.0119084	0.0526476		EIF3A	1.09597	5.68975e-19	1.19485e-17		METTL3	0.834605	7.38865e-18	1.4531e-16		METTL3	0.917835	1.45359e-06	7.14684e-06		METTL3	1.09972	2.94391e-08	1.9299e-07
IGF2BP1	0.214089	3.43699e-80	2.88707e-78		IGF2BP1	0.247084	9.2523e-82	7.77194e-80		IGF2BP1	1.15412	9.97198e-07	2.88844e-06		METTL14	0.957272	0.189453	0.248394		METTL14	0.845822	1.36175e-07	8.927e-07		METTL14	0.883575	9.5537e-06	4.69723e-05
IGF2BP3	0.431996	9.85264e-46	4.13811e-44		IGF2BP3	1.10447	0.20347	0.371554		IGF2BP3	2.55667	4.22258e-54	3.54697e-52		METTL16	0.758698	5.37434e-12	2.8826e-11		METTL16	0.84412	1.21427e-06	7.14684e-06		METTL16	1.11259	0.001708	0.00438139
IGF2BP2	0.621267	4.71745e-33	1.32089e-31		IGF2BP2	0.75831	3.71297e-10	1.55945e-08		IGF2BP2	1.22059	3.56765e-11	1.87302e-10		ZC3H13	1.26887	0.000350743	0.000739067		ZC3H13	0.935442	0.229139	0.329736		ZC3H13	0.737224	1.71928e-07	1.01437e-06
RBM15B	0.938588	6.21593e-20	1.30535e-18		RBM15B	0.998934	0.885089	0.929344		RBM15B	1.06429	1.12344e-16	1.57282e-15		HNRNPC	0.900753	1.52055e-16	1.79425e-15		HNRNPC	0.962348	0.000295968	0.00091906		HNRNPC	1.06838	3.22953e-10	6.35141e-09
METTL16	0.936555	3.93889e-12	2.36333e-11		METTL16	0.977678	0.0295885	0.0953875		METTL16	1.04391	5.88221e-06	1.49729e-05		HNRNPA2B1	0.938398	1.43749e-11	7.06767e-11		HNRNPA2B1	0.961229	1.40462e-06	7.14684e-06		HNRNPA2B1	1.02433	0.00246228	0.00581098
METTL14	0.973662	0.00151546	0.00289316		METTL14	1.03396	0.0010306	0.00756665		METTL14	1.06193	1.0624e-09	4.05644e-09		HNRNPG	0.844382	1.02744e-22	6.06187e-21		HNRNPG	0.889931	6.64414e-17	1.30668e-15		HNRNPG	1.05394	5.53962e-05	0.000214319
ZC3H13	0.987438	0.230253	0.257884		ZC3H13	1.07249	2.31828e-07	6.49119e-06		ZC3H13	1.08613	8.26003e-11	3.6518e-10		YTHDF1	0.899092	1.30433e-09	5.13036e-09		YTHDF1	0.990531	0.521046	0.602778		YTHDF1	1.1017	1.83374e-08	1.35238e-07
ALKBH5	0.96639	6.07447e-07	1.96252e-06		ALKBH5	1.00244	0.730003	0.863665		ALKBH5	1.03731	3.34733e-07	1.04139e-06		YTHDF2	0.912019	1.20348e-06	3.22751e-06		YTHDF2	0.955048	0.00495096	0.0121711		YTHDF2	1.04718	0.0106053	0.0223468
YTHDC1	0.949192	1.03061e-11	5.77144e-11		YTHDC1	1.02356	0.00593519	0.0305302		YTHDC1	1.07835	9.15643e-20	2.5638e-18		YTHDF3	0.896927	3.50623e-07	9.85083e-07		YTHDF3	0.841926	9.39751e-18	2.77227e-16		YTHDF3	0.938678	0.00148187	0.00407368
RBM15	0.953861	7.90351e-08	3.0177e-07		RBM15	1.00237	0.784997	0.867761		RBM15	1.05085	3.27772e-08	1.1472e-07		YTHDC1	0.875672	7.38999e-10	3.11435e-09		YTHDC1	0.900732	5.95436e-10	7.02614e-09		YTHDC1	1.02862	0.0976542	0.155719
KIAA1429	0.931939	4.71802e-17	4.95393e-16		KIAA1429	0.981701	0.0251416	0.0953875		KIAA1429	1.0534	2.05202e-11	1.20311e-10		YTHDC2	1.00935	0.757942	0.828122		YTHDC2	0.876752	7.68326e-08	5.66641e-07		YTHDC2	0.868632	3.65592e-07	1.9609e-06
HNRNPA2B1	0.954872	3.14431e-18	5.28244e-17		HNRNPA2B1	1.0059	0.255641	0.429477		HNRNPA2B1	1.05344	3.28104e-22	1.37804e-20		IGF2BP1	0.23302	3.52329e-14	2.59843e-13		IGF2BP1	0.888444	0.62402	0.694664		IGF2BP1	3.81273	3.0846e-13	1.81991e-11
YTHDF3	0.970994	0.000130482	0.000281039		YTHDF3	1.0116	0.176246	0.33647		YTHDF3	1.04182	1.09722e-06	3.07221e-06		IGF2BP2	0.467294	3.97519e-12	2.34536e-11		IGF2BP2	0.835333	0.126502	0.219518		IGF2BP2	1.7876	6.5894e-10	9.71936e-09
YTHDF2	0.96177	3.73737e-10	1.65231e-09		YTHDF2	1.0138	0.0317958	0.0953875		YTHDF2	1.0541	1.08585e-14	9.12111e-14		IGF2BP3	0.353566	2.41464e-14	2.0352e-13		IGF2BP3	0.716781	0.0244671	0.049778		IGF2BP3	2.02729	3.80858e-09	3.74511e-08
YTHDF1	0.949882	6.99095e-17	6.52488e-16		YTHDF1	1.0004	0.948106	0.948106		YTHDF1	1.05319	5.07612e-16	5.32993e-15		EIF3A	0.868115	1.66128e-10	7.53966e-10		EIF3A	0.82311	9.66196e-19	5.70056e-17		EIF3A	0.948157	0.001519	0.00407368
METTL3	0.927837	7.6774e-16	6.44902e-15		METTL3	1.00874	0.443932	0.632039		METTL3	1.0872	2.93293e-15	2.7374e-14		FTO	0.905478	0.00848675	0.014727		FTO	0.853022	2.75968e-08	2.32602e-07		FTO	0.942069	0.0818769	0.136194
WTAP	0.947757	5.62335e-11	2.62423e-10		WTAP	1.01291	0.121768	0.273359		WTAP	1.06874	4.57929e-16	5.32993e-15		ALKBH5	0.926628	0.000307167	0.000671218		ALKBH5	0.980167	0.33928	0.444833		ALKBH5	1.05778	0.0128059	0.0251849
aDC	0.451731	0.0400155	0.0579535		aDC	1.20152	0.765384	0.867761		aDC	2.65981	0.0163253	0.0240584		aDC	1.34886	0.2223	0.285124		aDC	1.38713	0.182763	0.283764		aDC	1.02838	0.92502	0.940969
B cells	0.543585	0.086397	0.115196		B cells	0.702409	0.366259	0.530444		B cells	1.29218	0.42076	0.47762		B cells	0.759928	0.0298463	0.0463402		B cells	0.839253	0.169218	0.277329		B cells	1.10438	0.411149	0.539062
CD8 T cells	1.02357	0.0017601	0.00328552		CD8 T cells	1.01085	0.123662	0.273359		CD8 T cells	0.987576	0.07985	0.103191		CD8 T cells	1.0511	0.00263415	0.00470954		CD8 T cells	1.00023	0.9872	0.9872		CD8 T cells	0.951609	0.00313701	0.0071186
Cytotoxic cells	1.45565	3.84605e-07	1.29227e-06		Cytotoxic cells	1.14056	0.0310917	0.0953875		Cytotoxic cells	0.78354	0.00194505	0.00363144		Cytotoxic cells	2.08048	0.00195756	0.00372567		Cytotoxic cells	1.23605	0.226129	0.329736		Cytotoxic cells	0.594117	0.0681702	0.122934
DC	1.65565	1.56438e-15	1.09506e-14		DC	1.12441	0.0196726	0.0826251		DC	0.679138	5.68689e-08	1.8757e-07		DC	1.515	6.65268e-08	2.06583e-07		DC	1.40802	0.0239928	0.049778		DC	0.654	6.89587e-05	0.000239327
Eosinophils	1.01947	0.174373	0.212281		Eosinophils	1.02019	0.215162	0.384544		Eosinophils	1.00071	0.963448	0.963448		Eosinophils	1.18613	4.09891e-06	1.05146e-05		Eosinophils	1.03161	0.325955	0.444833		Eosinophils	0.869722	4.98928e-05	0.000210263
iDC	1.07677	0.0590953	0.0813771		iDC	1.00972	0.804559	0.877701		iDC	0.937732	0.111838	0.140214		iDC	0.935587	0.501892	0.592233		iDC	0.979984	0.813913	0.857515		iDC	1.04745	0.631269	0.760099
Macrophages	0.943098	0.0434742	0.0618955		Macrophages	0.969614	0.326285	0.507554		Macrophages	1.02812	0.329166	0.384027		Macrophages	0.837979	0.0158161	0.0266615		Macrophages	0.861568	0.0209984	0.0458853		Macrophages	1.02815	0.708698	0.819866
Mast cells	1.00502	0.965846	0.977482		Mast cells	0.965296	0.775282	0.867761		Mast cells	0.960479	0.72942	0.775586		Mast cells	0.95635	0.476024	0.573172		Mast cells	0.941137	0.334376	0.444833		Mast cells	0.984093	0.804508	0.895584
Neutrophils	1.39356	1.17221e-07	4.28111e-07		Neutrophils	1.18723	0.00387048	0.0216747		Neutrophils	0.851945	0.0181417	0.0262742		Neutrophils	1.132	0.000714841	0.00145433		Neutrophils	1.94202	0.378171	0.464835		Neutrophils	0.895	0.0127691	0.0251849
NK CD56bright cells	0.88991	0.00268844	0.00480487		NK CD56bright cells	0.863975	0.000108554	0.00101317		NK CD56bright cells	0.970857	0.443979	0.490714		NK CD56bright cells	0.545776	0.0226964	0.0361916		NK CD56bright cells	2.30135	0.0955289	0.170794		NK CD56bright cells	4.21664	0.000245518	0.000804755
NK CD56dim cells	1.32497	0.193587	0.222758		NK CD56dim cells	1.10971	0.600827	0.764689		NK CD56dim cells	0.83754	0.440574	0.490714		NK CD56dim cells	1.0571	0.580104	0.658195		NK CD56dim cells	1.02881	0.728206	0.781166		NK CD56dim cells	0.973236	0.796272	0.895584
NK cells	1.03423	0.0131465	0.0204501		NK cells	1.02806	0.0303297	0.0953875		NK cells	0.994033	0.661812	0.71272		NK cells	1.07193	0.0932945	0.141138		NK cells	1.03058	0.355462	0.451186		NK cells	0.96142	0.364152	0.501587
pDC	1.4045	1.3674e-07	4.78589e-07		pDC	0.847272	0.00617873	0.0305302		pDC	0.603256	1.45607e-11	9.40846e-11		pDC	1.00478	0.368704	0.453198		pDC	0.999856	0.0766457	0.141315		pDC	0.9951	0.354486	0.501587
T cells	0.869014	0.23418	0.258831		T cells	0.881639	0.265513	0.437315		T cells	1.01453	0.898488	0.931765		T cells	0.780624	0.823827	0.86796		T cells	0.488425	0.411006	0.494885		T cells	0.625685	0.574409	0.706044
T helper cells	0.941455	2.34795e-09	9.8614e-09		T helper cells	1.02097	0.0265522	0.0953875		T helper cells	1.08446	3.85136e-13	2.69595e-12		T helper cells	0.898012	2.75668e-07	8.13221e-07		T helper cells	0.911751	5.08841e-06	2.30936e-05		T helper cells	1.0153	0.423427	0.543091
Tcm	0.975177	0.113131	0.143986		Tcm	1.05723	0.00108095	0.00756665		Tcm	1.08415	4.57226e-06	1.20022e-05		Tcm	1.0052	0.881739	0.896941		Tcm	0.876896	5.61425e-06	2.36601e-05		Tcm	0.872364	2.53213e-05	0.00011492
Tem	0.94645	0.0127015	0.0201307		Tem	0.983963	0.475261	0.665366		Tem	1.03964	0.0773007	0.101457		Tem	0.895027	0.131637	0.189429		Tem	0.974284	0.697548	0.762135		Tem	1.08855	0.279131	0.411718
TFH	0.780418	1.09672e-08	4.38686e-08		TFH	0.870502	0.0014026	0.00906293		TFH	1.11543	0.0060154	0.00973201		TFH	1.0018	0.99598	0.99598		TFH	0.561042	0.012205	0.027696		TFH	0.560035	0.0278257	0.0529587
Tgd	0.9737	0.813531	0.833373		Tgd	1.12046	0.347786	0.512527		Tgd	1.15072	0.246577	0.300181		Tgd	0.786976	0.00155262	0.00305349		Tgd	0.842181	0.0444263	0.0873718		Tgd	1.07015	0.369645	0.501587
Th1 cells	0.949702	0.616076	0.64688		Th1 cells	1.05852	0.568417	0.752605		Th1 cells	1.11458	0.277937	0.333525		Th1 cells	1.11684	0.862585	0.892851		Th1 cells	1.61187	0.49675	0.586166		Th1 cells	1.44324	0.686352	0.809895
Th17 cells	1.17102	1.68915e-05	4.29964e-05		Th17 cells	1.03182	0.237878	0.407791		Th17 cells	0.881128	0.000735862	0.00147172		Th17 cells	1.04978	0.319433	0.40099		Th17 cells	0.967716	0.359419	0.451186		Th17 cells	0.921824	0.078815	0.136194
Th2 cells	0.790047	1.12441e-15	8.5864e-15		Th2 cells	0.96071	0.166172	0.324616		Th2 cells	1.21602	2.1484e-11	1.20311e-10		Th2 cells	0.265528	7.30388e-09	2.69331e-08		Th2 cells	0.405305	0.00032833	0.000968573		Th2 cells	1.52641	0.00542135	0.0118467
TReg	3.95626	3.85949e-05	9.26278e-05		TReg	4.16303	1.41338e-05	0.000197873		TReg	1.05226	0.912535	0.934792		TReg	0.976	4.17066e-05	9.4642e-05		TReg	0.563	9.47533e-05	0.00032885		TReg	1.06605	0.908021	0.939881
Angiogenesis	1.31355	4.69317e-06	1.2717e-05		Angiogenesis	1.10442	0.0633019	0.156393		Angiogenesis	0.840787	0.0102163	0.0153245		Angiogenesis	2.66	0.0204046	0.0334408		Angiogenesis	0.780089	0.270331	0.37975		Angiogenesis	0.293266	0.00226139	0.00555925
antigen processing machinery	1.0085	0.180321	0.2141		antigen processing machinery	0.99914	0.879333	0.929344		antigen processing machinery	0.990716	0.154883	0.191326		antigen processing machinery	1.00578	0.523133	0.605193		antigen processing machinery	0.989013	0.211165	0.319455		antigen processing machinery	0.983333	0.0831016	0.136194
APAP Antigen processing and presentation	0.975605	0.0355237	0.0531625		APAP Antigen processing and presentation	1.02735	0.0343208	0.099412		APAP Antigen processing and presentation	1.05304	3.97397e-05	9.02198e-05		APAP Antigen processing and presentation	0.964914	0.183795	0.248394		APAP Antigen processing and presentation	0.922115	0.000871368	0.00244813		APAP Antigen processing and presentation	0.955645	0.0687594	0.122934
CD8 T-effector signature	1.25122	0.29264	0.319243		CD8 T-effector signature	1.22452	0.276995	0.447453		CD8 T-effector signature	0.978656	0.928473	0.939659		CD8 T-effector signature	1.20795	0.599204	0.667038		CD8 T-effector signature	0.943139	0.851164	0.88103		CD8 T-effector signature	0.780774	0.501242	0.629218
cell cycle	0.901073	3.65192e-17	4.38231e-16		cell cycle	0.974552	0.0213337	0.0853348		cell cycle	1.08155	7.63058e-11	3.56094e-10		cell cycle	0.815772	1.58483e-17	2.33762e-16		cell cycle	0.914995	1.84028e-05	7.23844e-05		cell cycle	1.12163	1.70681e-08	1.35238e-07
DNA damage repair DDR	0.957877	3.25368e-06	9.1103e-06		DNA damage repair DDR	0.986963	0.141319	0.296769		DNA damage repair DDR	1.03037	0.00138008	0.00269597		DNA damage repair DDR	0.939289	3.48073e-05	8.21453e-05		DNA damage repair DDR	0.992186	0.604389	0.685749		DNA damage repair DDR	1.05632	0.000698256	0.00205985
DNA replication	0.887061	5.5071e-11	2.62423e-10		DNA replication	0.934382	0.000171226	0.0014383		DNA replication	1.05335	0.00519259	0.00872355		DNA replication	0.77496	1.16617e-14	1.14674e-13		DNA replication	0.928369	0.0117909	0.027696		DNA replication	1.19796	1.94677e-09	2.29719e-08
EMT 1	0.963729	0.169383	0.209238		EMT 1	0.992277	0.779149	0.867761		EMT 1	1.02962	0.295337	0.349413		EMT 1	1.09467	0.100218	0.147821		EMT 1	1.00214	0.963292	0.979901		EMT 1	0.915474	0.146711	0.22713
EMT 2	1.00083	0.991906	0.991906		EMT 2	1.01603	0.835817	0.90011		EMT 2	1.01519	0.853378	0.896047		EMT 2	0.219166	0.173134	0.243213		EMT 2	0.223084	0.140061	0.236103		EMT 2	1.01788	0.978299	0.978299
EMT 3	0.879628	0.0161071	0.0245999		EMT 3	1.02298	0.672427	0.830646		EMT 3	1.16297	0.00443754	0.0077657		EMT 3	0.890217	0.818474	0.86796		EMT 3	0.620327	0.175497	0.279846		EMT 3	0.696826	0.374065	0.501587
NER Nucleotide excision repair	0.976893	0.00405778	0.00710112		NER Nucleotide excision repair	0.984923	0.0630828	0.156393		NER Nucleotide excision repair	1.00822	0.356295	0.409984		NER Nucleotide excision repair	0.92413	2.54663e-08	8.83832e-08		NER Nucleotide excision repair	0.975972	0.0582006	0.110769		NER Nucleotide excision repair	1.0561	5.81204e-05	0.000214319
TGF-β pathway	0.966278	0.00809489	0.0133328		TGF-β pathway	1.02336	0.0936185	0.218443		TGF-β pathway	1.05907	3.72723e-05	8.69687e-05		TGF-β pathway	0.962774	0.185644	0.248394		TGF-β pathway	0.926139	0.00247591	0.00663994		TGF-β pathway	0.961949	0.150137	0.22713
wnt pathway	0.952289	2.04413e-06	5.92094e-06		wnt pathway	0.979975	0.0479294	0.129873		wnt pathway	1.02907	0.00481809	0.00825958		wnt pathway	0.897071	2.36088e-05	5.80384e-05		wnt pathway	0.892601	4.20761e-09	4.13748e-08		wnt pathway	0.995018	0.824596	0.900947
CD8A	0.907938	0.00455426	0.00780731		CD8A	1.03332	0.322517	0.507554		CD8A	1.1381	0.000179063	0.000385675
CXCL10	0.981618	0.520084	0.560091		CXCL10	1.05866	0.042289	0.118409		CXCL10	1.07848	0.00913675	0.0139543
CXCL9	0.963655	0.213812	0.242705		CXCL9	1.04994	0.0774356	0.185845		CXCL9	1.08954	0.0037839	0.00690974
GZMA	0.963696	0.16926	0.209238		GZMA	1.01698	0.53047	0.730484		GZMA	1.05529	0.0512813	0.0706168
GZMB	0.955993	0.180965	0.2141		GZMB	1.01716	0.592108	0.764689		GZMB	1.06398	0.0748359	0.0997813
IFNG	0.741691	0.00202769	0.00370274		IFNG	0.991384	0.932028	0.943257		IFNG	1.33665	0.00391321	0.00699382
CD80	0.803845	5.35769e-05	0.000125013		CD80	1.09004	0.15725	0.3145		CD80	1.35604	5.80574e-08	1.8757e-07
CD86	0.918421	0.000236787	0.000473573		CD86	1.01382	0.551685	0.747444		CD86	1.10388	2.12021e-05	5.23817e-05
CTLA4	0.769577	1.22017e-06	3.79609e-06		CTLA4	0.920543	0.14909	0.305452		CTLA4	1.19617	0.000425042	0.000870817
HAVCR2	0.915692	0.000122707	0.000271248		HAVCR2	1.00797	0.72993	0.863665		HAVCR2	1.10077	2.24851e-05	5.39642e-05
IDO1	0.93918	0.106849	0.138082		IDO1	1.0506	0.224706	0.393236		IDO1	1.11864	0.00874998	0.0136111
LAG3	0.905861	0.000633279	0.0012371		LAG3	0.972741	0.347692	0.512527		LAG3	1.07383	0.0227669	0.0324139
PD1	0.77964	1.82652e-06	5.47956e-06		PD1	0.900461	0.0535193	0.140488		PD1	1.15497	0.00640751	0.0101553
PDL1	0.985801	0.592301	0.629788		PDL1	1.14492	3.4224e-07	7.18703e-06		PDL1	1.16142	1.58528e-06	4.29559e-06
PDL2	0.955106	0.191397	0.222758		PDL2	1.09863	0.0103205	0.0481622		PDL2	1.15027	0.000225939	0.000474473
TIGIT	0.862451	0.000172833	0.000354096		TIGIT	1.01901	0.64263	0.805686		TIGIT	1.18153	7.30952e-05	0.000161579
ACTA2	0.994829	0.68045	0.705651		ACTA2	1.01855	0.184912	0.345168		ACTA2	1.02384	0.081173	0.103311
COL4A1	0.949753	1.58443e-05	4.15914e-05		COL4A1	1.03018	0.0298635	0.0953875		COL4A1	1.08468	6.59864e-10	2.63945e-09
PDGFRA	0.90858	0.0451801	0.0632521		PDGFRA	0.994566	0.915016	0.941821		PDGFRA	1.09464	0.059175	0.0801726
TGFB2	0.865279	0.000156316	0.000328263		TGFB2	1.06211	0.135485	0.291815		TGFB2	1.22747	6.10888e-07	1.83266e-06
TGFBR2	0.971123	0.00553039	0.00929106		TGFBR2	1.03639	0.00351062	0.0210637		TGFBR2	1.0672	1.57987e-08	5.76997e-08
WNT1	0.785641	0.104807	0.13756		WNT1	1.10808	0.573414	0.752605		WNT1	1.41041	0.0314313	0.0440039
CTNNB1	0.951761	4.84846e-11	2.54544e-10		CTNNB1	1.0031	0.727874	0.863665		CTNNB1	1.05395	3.83586e-11	1.89537e-10
WNT3A	0.535921	2.45757e-05	6.07165e-05		WNT3A	0.499124	3.31069e-05	0.000347622		WNT3A	0.93134	0.604341	0.659281
WNT7A	0.744152	0.0630428	0.0854129		WNT7A	1.18558	0.345574	0.512527		WNT7A	1.5932	0.00194541	0.00363144

[truncated: 1 more sheets: TableS11]
